# Supplementary material for: Fecal microbiome analysis in patients with metabolic syndrome and type 2 diabetes
Source: PeerJ. 2025 Jun 11;13:e19108. doi: 10.7717/peerj.19108 (PMC12166849; doi:10.7717/peerj.19108)
Supplement: Supplemental Information 1 [file peerj-13-19108-s001.xlsx]

## Sheet: Phylum_ratios_MS
Sample	Phylum	Abundance
MS	Patescibacteria	0
MS	Verrucomicrobiota	0.0008
MS	Desulfobacterota	0.0019
MS	Proteobacteria	0.0231
MS	Actinobacteriota	0.0508
MS	Bacteroidota	0.327
MS	Firmicutes	0.5963
No_MS	Patescibacteria	0.0001
No_MS	Desulfobacterota	0.0022
No_MS	Verrucomicrobiota	0.003
No_MS	Proteobacteria	0.0197
No_MS	Actinobacteriota	0.0534
No_MS	Bacteroidota	0.3944
No_MS	Firmicutes	0.5272

## Sheet: Phylum_ratios_DT2
Sample	Phylum	Abundance
DT2	Patescibacteria	0
DT2	Verrucomicrobiota	0.0028
DT2	Desulfobacterota	0.0041
DT2	Actinobacteriota	0.0157
DT2	Proteobacteria	0.0259
DT2	Bacteroidota	0.4558
DT2	Firmicutes	0.4957
Healthy	Patescibacteria	0.0001
Healthy	Desulfobacterota	0.0019
Healthy	Verrucomicrobiota	0.0023
Healthy	Proteobacteria	0.0215
Healthy	Actinobacteriota	0.058
Healthy	Bacteroidota	0.3629
Healthy	Firmicutes	0.5535
PreDT2	Patescibacteria	0
PreDT2	Verrucomicrobiota	0.0023
PreDT2	Desulfobacterota	0.0025
PreDT2	Proteobacteria	0.0165
PreDT2	Actinobacteriota	0.0415
PreDT2	Bacteroidota	0.3882
PreDT2	Firmicutes	0.549

## Sheet: Linda_results_Genus_MS
log2FoldChange	pvalue	padj	Kingdom	Phylum	Class	Order	Family	Genus
-2.88286	0.0256993	0.200454	Bacteria	Bacteroidota	Bacteroidia	Bacteroidales	Prevotellaceae	Prevotellaceae NK3B31 group
-2.56668	0.0143568	0.179437	Bacteria	Firmicutes	Clostridia	Lachnospirales	Lachnospiraceae	[Eubacterium] eligens group
-1.82602	0.233006	0.580037	Bacteria	Bacteroidota	Bacteroidia	Bacteroidales	Prevotellaceae	Prevotella_9
-1.70997	0.0496622	0.269745	Bacteria	Firmicutes	Clostridia	Oscillospirales	Oscillospiraceae	UCG-002
-1.46853	0.0932389	0.363632	Bacteria	Firmicutes	Clostridia	Oscillospirales	Oscillospiraceae	UCG-003
-1.46767	0.0845482	0.363632	Bacteria	Bacteroidota	Bacteroidia	Bacteroidales	Tannerellaceae	Parabacteroides
-1.4613	0.150218	0.532592	Bacteria	Proteobacteria	Gammaproteobacteria	Burkholderiales	Sutterellaceae	Parasutterella
-1.27969	0.0649846	0.3168	Bacteria	Desulfobacterota	Desulfovibrionia	Desulfovibrionales	Desulfovibrionaceae	Bilophila
-1.25234	0.265119	0.596526	Bacteria	Bacteroidota	Bacteroidia	Bacteroidales	Prevotellaceae	Prevotella
-1.17128	0.341188	0.633634	Bacteria	Bacteroidota	Bacteroidia	Bacteroidales	Prevotellaceae	Paraprevotella
-1.09813	0.19487	0.547594	Bacteria	Firmicutes	Clostridia	Oscillospirales	Oscillospiraceae	NK4A214 group
-1.09577	0.170112	0.547594	Bacteria	Firmicutes	Clostridia	Lachnospirales	Lachnospiraceae	Tuzzerella
-0.941188	0.369196	0.654483	Bacteria	Firmicutes	Negativicutes	Acidaminococcales	Acidaminococcaceae	Phascolarctobacterium
-0.749612	0.339227	0.633634	Bacteria	Firmicutes	Clostridia	Oscillospirales	Oscillospiraceae	UCG-005
-0.719126	0.43247	0.712662	Bacteria	Bacteroidota	Bacteroidia	Bacteroidales	Marinifilaceae	Butyricimonas
-0.686087	0.460823	0.748838	Bacteria	Bacteroidota	Bacteroidia	Bacteroidales	Prevotellaceae	Prevotella_7
-0.662227	0.336441	0.633634	Bacteria	Firmicutes	Clostridia	Oscillospirales	Oscillospiraceae	Colidextribacter
-0.660409	0.213244	0.554434	Bacteria	Firmicutes	Clostridia	Lachnospirales	Defluviitaleaceae	Defluviitaleaceae UCG-011
-0.589595	0.508676	0.793534	Bacteria	Firmicutes	Clostridia	Christensenellales	Christensenellaceae	Christensenellaceae R-7 group
-0.566318	0.528563	0.813709	Bacteria	Firmicutes	Clostridia	Lachnospirales	Lachnospiraceae	Howardella
-0.565101	0.411531	0.687845	Bacteria	Firmicutes	Clostridia	Lachnospirales	Lachnospiraceae	Lachnospiraceae UCG-010
-0.521392	0.568929	0.853394	Bacteria	Verrucomicrobiota	Verrucomicrobiae	Verrucomicrobiales	Akkermansiaceae	Akkermansia
-0.433161	0.604232	0.872779	Bacteria	Firmicutes	Clostridia	Lachnospirales	Lachnospiraceae	Anaerostignum
-0.405383	0.747314	0.942981	Bacteria	Firmicutes	Bacilli	Erysipelotrichales	Erysipelatoclostridiaceae	Catenibacterium
-0.391809	0.64335	0.903543	Bacteria	Firmicutes	Clostridia	Oscillospirales	Oscillospiraceae	Oscillospira
-0.356497	0.651769	0.903543	Bacteria	Firmicutes	Clostridia	Peptococcales	Peptococcaceae	Peptococcus
-0.351846	0.788193	0.970722	Bacteria	Firmicutes	Bacilli	Erysipelotrichales	Erysipelotrichaceae	Holdemanella
-0.293668	0.722926	0.942981	Bacteria	Firmicutes	Clostridia	Lachnospirales	Lachnospiraceae	Lachnospiraceae NK4A136 group
-0.292719	0.731337	0.942981	Bacteria	Bacteroidota	Bacteroidia	Bacteroidales	Marinifilaceae	Odoribacter
-0.239906	0.747617	0.942981	Bacteria	Firmicutes	Clostridia	Oscillospirales	Oscillospiraceae	Oscillibacter
-0.21454	0.736829	0.942981	Bacteria	Proteobacteria	Gammaproteobacteria	Burkholderiales	Oxalobacteraceae	Oxalobacter
-0.210891	0.838448	0.980644	Bacteria	Firmicutes	Clostridia	Oscillospirales	Ruminococcaceae	[Eubacterium] siraeum group
-0.182052	0.872888	0.980644	Bacteria	Firmicutes	Clostridia	Lachnospirales	Lachnospiraceae	[Eubacterium] ruminantium group
-0.174484	0.851242	0.980644	Bacteria	Firmicutes	Clostridia	Lachnospirales	Lachnospiraceae	Lachnospira
-0.164737	0.843155	0.980644	Bacteria	Firmicutes	Clostridia	Lachnospirales	Lachnospiraceae	Lachnoclostridium
-0.164487	0.856948	0.980644	Bacteria	Firmicutes	Clostridia	Lachnospirales	Lachnospiraceae	CAG-56
-0.0953495	0.887186	0.980644	Bacteria	Firmicutes	Clostridia	Lachnospirales	Lachnospiraceae	GCA-900066575
-0.0890214	0.896829	0.980644	Bacteria	Actinobacteriota	Coriobacteriia	Coriobacteriales	Atopobiaceae	Olsenella
-0.0865593	0.926503	0.991502	Bacteria	Firmicutes	Negativicutes	Acidaminococcales	Acidaminococcaceae	Acidaminococcus
-0.0658053	0.942514	0.991502	Bacteria	Firmicutes	Clostridia	Lachnospirales	Lachnospiraceae	Lachnospiraceae UCG-004
-0.057211	0.954812	0.991502	Bacteria	Proteobacteria	Gammaproteobacteria	Enterobacterales	Pasteurellaceae	Haemophilus
-0.0366445	0.96697	0.991502	Bacteria	Firmicutes	Clostridia	Lachnospirales	Lachnospiraceae	[Eubacterium] xylanophilum group
-0.0245068	0.971993	0.991502	Bacteria	Bacteroidota	Bacteroidia	Bacteroidales	Bacteroidaceae	Bacteroides
-0.00370299	0.997393	0.997393	Bacteria	Proteobacteria	Gammaproteobacteria	Burkholderiales	Sutterellaceae	Sutterella
0.0138576	0.983027	0.991502	Bacteria	Firmicutes	Clostridia	Oscillospirales	Ruminococcaceae	Candidatus Soleaferrea
0.0317203	0.978562	0.991502	Bacteria	Firmicutes	Bacilli	Lactobacillales	Lactobacillaceae	Ligilactobacillus
0.03682	0.971847	0.991502	Bacteria	Proteobacteria	Gammaproteobacteria	Enterobacterales	Enterobacteriaceae	Klebsiella
0.0512224	0.952674	0.991502	Bacteria	Firmicutes	Clostridia	Lachnospirales	Lachnospiraceae	[Eubacterium] ventriosum group
0.100644	0.895364	0.980644	Bacteria	Bacteroidota	Bacteroidia	Bacteroidales	Rikenellaceae	Alistipes
0.131341	0.896423	0.980644	Bacteria	Firmicutes	Clostridia	Lachnospirales	Lachnospiraceae	Lachnospiraceae NC2004 group
0.145602	0.842223	0.980644	Bacteria	Firmicutes	Clostridia	Oscillospirales	Ruminococcaceae	Incertae Sedis
0.17775	0.815572	0.980644	Bacteria	Firmicutes	Clostridia	Lachnospirales	Lachnospiraceae	Lachnospiraceae UCG-003
0.213385	0.808308	0.980644	Bacteria	Actinobacteriota	Coriobacteriia	Coriobacteriales	Eggerthellaceae	Enterorhabdus
0.257224	0.655748	0.903543	Bacteria	Firmicutes	Clostridia	Lachnospirales	Lachnospiraceae	Syntrophococcus
0.323765	0.580153	0.859214	Bacteria	Patescibacteria	Saccharimonadia	Saccharimonadales	Saccharimonadaceae	TM7x
0.333096	0.764419	0.951457	Bacteria	Firmicutes	Bacilli	Erysipelotrichales	Erysipelotrichaceae	Turicibacter
0.350296	0.749549	0.942981	Bacteria	Desulfobacterota	Desulfovibrionia	Desulfovibrionales	Desulfovibrionaceae	Desulfovibrio
0.3731	0.558762	0.849029	Bacteria	Firmicutes	Clostridia	Oscillospirales	Oscillospiraceae	Intestinimonas
0.375207	0.65642	0.903543	Bacteria	Firmicutes	Clostridia	Lachnospirales	Lachnospiraceae	Lachnospiraceae ND3007 group
0.376205	0.744576	0.942981	Bacteria	Bacteroidota	Bacteroidia	Bacteroidales	Barnesiellaceae	Barnesiella
0.385069	0.670348	0.911985	Bacteria	Firmicutes	Clostridia	Lachnospirales	Lachnospiraceae	Lachnospiraceae UCG-001
0.566484	0.391317	0.673295	Bacteria	Firmicutes	Clostridia	Peptostreptococcales-Tissierellales	Anaerovoracaceae	Family XIII UCG-001
0.578045	0.587583	0.85934	Bacteria	Proteobacteria	Gammaproteobacteria	Enterobacterales	Enterobacteriaceae	Escherichia-Shigella
0.591521	0.472455	0.757223	Bacteria	Firmicutes	Negativicutes	Veillonellales-Selenomonadales	Veillonellaceae	Veillonella
0.601228	0.365927	0.654483	Bacteria	Firmicutes	Clostridia	Lachnospirales	Lachnospiraceae	Fusicatenibacter
0.647762	0.338581	0.633634	Bacteria	Firmicutes	Clostridia	Oscillospirales	Ruminococcaceae	UBA1819
0.669297	0.292248	0.610102	Bacteria	Firmicutes	Clostridia	Lachnospirales	Lachnospiraceae	Roseburia
0.71136	0.479628	0.758331	Bacteria	Firmicutes	Clostridia	Lachnospirales	Lachnospiraceae	[Ruminococcus] gnavus group
0.734601	0.409854	0.687845	Bacteria	Actinobacteriota	Coriobacteriia	Coriobacteriales	Eggerthellaceae	Senegalimassilia
0.744327	0.293728	0.610102	Bacteria	Firmicutes	Clostridia	Oscillospirales	Ruminococcaceae	Subdoligranulum
0.74531	0.33653	0.633634	Bacteria	Firmicutes	Clostridia	Oscillospirales	Ruminococcaceae	Negativibacillus
0.784931	0.174012	0.547594	Bacteria	Firmicutes	Clostridia	Oscillospirales	Ruminococcaceae	Faecalibacterium
0.803634	0.268278	0.596526	Bacteria	Firmicutes	Negativicutes	Veillonellales-Selenomonadales	Veillonellaceae	Allisonella
0.831075	0.280537	0.60783	Bacteria	Firmicutes	Clostridia	Lachnospirales	Lachnospiraceae	Marvinbryantia
0.847444	0.297229	0.610102	Bacteria	Firmicutes	Clostridia	Lachnospirales	Lachnospiraceae	Coprococcus
0.868411	0.384629	0.671666	Bacteria	Firmicutes	Bacilli	Erysipelotrichales	Erysipelatoclostridiaceae	Erysipelotrichaceae UCG-003
0.874579	0.367772	0.654483	Bacteria	Actinobacteriota	Actinobacteria	Bifidobacteriales	Bifidobacteriaceae	Bifidobacterium
0.934889	0.25138	0.596526	Bacteria	Bacteroidota	Bacteroidia	Bacteroidales	Barnesiellaceae	Coprobacter
0.935857	0.327383	0.633634	Bacteria	Firmicutes	Clostridia	Oscillospirales	Oscillospiraceae	Flavonifractor
0.945203	0.170139	0.547594	Bacteria	Firmicutes	Clostridia	Lachnospirales	Lachnospiraceae	[Eubacterium] hallii group
0.980015	0.092149	0.363632	Bacteria	Firmicutes	Clostridia	Oscillospirales	Butyricicoccaceae	UCG-009
0.994472	0.186152	0.547594	Bacteria	Actinobacteriota	Coriobacteriia	Coriobacteriales	Eggerthellaceae	Slackia
0.999531	0.139249	0.509129	Bacteria	Firmicutes	Clostridia	Monoglobales	Monoglobaceae	Monoglobus
1.01207	0.261378	0.596526	Bacteria	Actinobacteriota	Coriobacteriia	Coriobacteriales	Eggerthellaceae	Gordonibacter
1.0748	0.270221	0.596526	Bacteria	Firmicutes	Clostridia	Peptostreptococcales-Tissierellales	Peptostreptococcaceae	Terrisporobacter
1.07802	0.0850061	0.363632	Bacteria	Firmicutes	Clostridia	Oscillospirales	Butyricicoccaceae	Butyricicoccus
1.11406	0.197567	0.547594	Bacteria	Firmicutes	Bacilli	Lactobacillales	Streptococcaceae	Lactococcus
1.14864	0.0274387	0.200646	Bacteria	Firmicutes	Clostridia	Lachnospirales	Lachnospiraceae	[Ruminococcus] torques group
1.18083	0.189916	0.547594	Bacteria	Actinobacteriota	Coriobacteriia	Coriobacteriales	Eggerthellaceae	Adlercreutzia
1.18358	0.205933	0.547594	Bacteria	Firmicutes	Clostridia	Lachnospirales	Lachnospiraceae	Butyrivibrio
1.22328	0.101977	0.384881	Bacteria	Firmicutes	Clostridia	Peptostreptococcales-Tissierellales	Anaerovoracaceae	[Eubacterium] brachy group
1.22733	0.191722	0.547594	Bacteria	Actinobacteriota	Coriobacteriia	Coriobacteriales	Eggerthellaceae	Eggerthella
1.27134	0.245313	0.596526	Bacteria	Bacteroidota	Bacteroidia	Bacteroidales	Prevotellaceae	Alloprevotella
1.30167	0.00501327	0.130069	Bacteria	Firmicutes	Clostridia	Oscillospirales	Ruminococcaceae	Paludicola
1.30658	0.0455456	0.266442	Bacteria	Actinobacteriota	Actinobacteria	Actinomycetales	Actinomycetaceae	Actinomyces
1.32362	0.0929997	0.363632	Bacteria	Firmicutes	Clostridia	Peptostreptococcales-Tissierellales	Anaerovoracaceae	Mogibacterium
1.34681	0.0507213	0.269745	Bacteria	Firmicutes	Clostridia	Lachnospirales	Lachnospiraceae	Robinsoniella
1.35862	0.0773873	0.362173	Bacteria	Firmicutes	Clostridia	Lachnospirales	Lachnospiraceae	Anaerostipes
1.39445	0.0347459	0.239134	Bacteria	Actinobacteriota	Coriobacteriia	Coriobacteriales	Coriobacteriaceae	Collinsella
1.46998	0.00667022	0.130069	Bacteria	Firmicutes	Clostridia	Lachnospirales	Lachnospiraceae	Dorea
1.52717	0.0212235	0.200454	Bacteria	Firmicutes	Bacilli	Lactobacillales	Lactobacillaceae	Lactobacillus
1.52793	0.0226889	0.200454	Bacteria	Bacteroidota	Bacteroidia	Bacteroidales	Rikenellaceae	Rikenella
1.53466	0.00538426	0.130069	Bacteria	Firmicutes	Clostridia	Peptostreptococcales-Tissierellales	Anaerovoracaceae	Family XIII AD3011 group
1.60925	0.162307	0.547594	Bacteria	Firmicutes	Clostridia	Oscillospirales	Ruminococcaceae	CAG-352
1.61535	0.202957	0.547594	Bacteria	Bacteroidota	Bacteroidia	Bacteroidales	Rikenellaceae	Rikenellaceae RC9 gut group
1.6937	0.21958	0.558497	Bacteria	Firmicutes	Negativicutes	Veillonellales-Selenomonadales	Veillonellaceae	Dialister
1.81072	0.01607	0.179437	Bacteria	Firmicutes	Clostridia	Lachnospirales	Lachnospiraceae	Agathobacter
1.85644	0.0106463	0.177945	Bacteria	Firmicutes	Clostridia	Lachnospirales	Lachnospiraceae	Lachnospiraceae FCS020 group
1.90373	0.0451772	0.266442	Bacteria	Firmicutes	Clostridia	Clostridiales	Clostridiaceae	Clostridium sensu stricto 1
2.05265	0.000567063	0.0663464	Bacteria	Firmicutes	Clostridia	Lachnospirales	Lachnospiraceae	Blautia
2.05319	0.0245578	0.200454	Bacteria	Firmicutes	Clostridia	Peptostreptococcales-Tissierellales	Peptostreptococcaceae	Romboutsia
2.06504	0.0168702	0.179437	Bacteria	Firmicutes	Clostridia	Oscillospirales	Ruminococcaceae	Ruminococcus
2.11154	0.0557202	0.283446	Bacteria	Firmicutes	Clostridia	Peptostreptococcales-Tissierellales	Peptostreptococcaceae	Intestinibacter
2.11578	0.0373359	0.242684	Bacteria	Firmicutes	Bacilli	Erysipelotrichales	Erysipelatoclostridiaceae	Erysipelatoclostridium
2.38558	0.00563746	0.130069	Bacteria	Firmicutes	Bacilli	Lactobacillales	Streptococcaceae	Streptococcus
2.43076	0.0162019	0.179437	Bacteria	Firmicutes	Clostridia	Lachnospirales	Lachnospiraceae	[Ruminococcus] gauvreauii group
3.1551	0.0012835	0.075085	Bacteria	Firmicutes	Clostridia	Lachnospirales	Lachnospiraceae	Tyzzerella

## Sheet: Linda_results_Species_MS
log2FoldChange	pvalue	padj	Kingdom	Phylum	Class	Order	Family	Genus	Species
-1.94086	0.0464496	0.348372	Bacteria	Bacteroidota	Bacteroidia	Bacteroidales	Tannerellaceae	Parabacteroides	Parabacteroides_merdae
-1.67679	0.0611389	0.37016	Bacteria	Bacteroidota	Bacteroidia	Bacteroidales	Bacteroidaceae	Bacteroides	Bacteroides_cellulosilyticus
-1.4119	0.306219	0.765547	Bacteria	Bacteroidota	Bacteroidia	Bacteroidales	Prevotellaceae	Prevotella_9	Prevotella_9_copri
-1.36616	0.192139	0.563328	Bacteria	Bacteroidota	Bacteroidia	Bacteroidales	Rikenellaceae	Alistipes	Alistipes_putredinis
-1.12429	0.140081	0.456787	Bacteria	Bacteroidota	Bacteroidia	Bacteroidales	Tannerellaceae	Parabacteroides	Parabacteroides_distasonis
-1.11778	0.171579	0.536184	Bacteria	Bacteroidota	Bacteroidia	Bacteroidales	Rikenellaceae	Alistipes	Alistipes_obesi
-0.995844	0.320152	0.774562	Bacteria	Bacteroidota	Bacteroidia	Bacteroidales	Rikenellaceae	Alistipes	Alistipes_finegoldii
-0.852614	0.382834	0.820358	Bacteria	Bacteroidota	Bacteroidia	Bacteroidales	Bacteroidaceae	Bacteroides	Bacteroides_thetaiotaomicron
-0.761069	0.511628	0.913621	Bacteria	Bacteroidota	Bacteroidia	Bacteroidales	Bacteroidaceae	Bacteroides	Bacteroides_massiliensis
-0.735363	0.48301	0.905644	Bacteria	Bacteroidota	Bacteroidia	Bacteroidales	Bacteroidaceae	Bacteroides	Bacteroides_dorei
-0.704991	0.381029	0.820358	Bacteria	Firmicutes	Clostridia	Lachnospirales	Lachnospiraceae	Roseburia	Roseburia_hominis
-0.704528	0.396709	0.826478	Bacteria	Proteobacteria	Gammaproteobacteria	Burkholderiales	Sutterellaceae	Parasutterella	Parasutterella_excrementihominis
-0.593658	0.585335	0.975558	Bacteria	Firmicutes	Bacilli	Erysipelotrichales	Erysipelotrichaceae	Holdemanella	Holdemanella_biformis
-0.480796	0.607065	0.989641	Bacteria	Actinobacteriota	Actinobacteria	Bifidobacteriales	Bifidobacteriaceae	Bifidobacterium	Bifidobacterium_adolescentis
-0.351145	0.748136	0.989641	Bacteria	Bacteroidota	Bacteroidia	Bacteroidales	Bacteroidaceae	Bacteroides	Bacteroides_vulgatus
-0.33022	0.665634	0.989641	Bacteria	Bacteroidota	Bacteroidia	Bacteroidales	Bacteroidaceae	Bacteroides	Bacteroides_salyersiae
-0.324597	0.650955	0.989641	Bacteria	Bacteroidota	Bacteroidia	Bacteroidales	Marinifilaceae	Odoribacter	Odoribacter_splanchnicus
-0.284447	0.692661	0.989641	Bacteria	Firmicutes	Clostridia	Lachnospirales	Lachnospiraceae	Coprococcus	Coprococcus_catus
-0.276978	0.808123	0.989641	Bacteria	Firmicutes	Negativicutes	Veillonellales-Selenomonadales	Veillonellaceae	Dialister	Dialister_invisus
-0.214968	0.788292	0.989641	Bacteria	Bacteroidota	Bacteroidia	Bacteroidales	Bacteroidaceae	Bacteroides	Bacteroides_fragilis
-0.205177	0.800137	0.989641	Bacteria	Bacteroidota	Bacteroidia	Bacteroidales	Bacteroidaceae	Bacteroides	Bacteroides_ovatus
-0.174512	0.850954	0.989641	Bacteria	Firmicutes	Clostridia	Lachnospirales	Lachnospiraceae	Lachnospira	Lachnospira_pectinoschiza
-0.126929	0.862475	0.989641	Bacteria	Verrucomicrobiota	Verrucomicrobiae	Verrucomicrobiales	Akkermansiaceae	Akkermansia	Akkermansia_muciniphila
-0.0833895	0.925504	0.989641	Bacteria	Firmicutes	Negativicutes	Acidaminococcales	Acidaminococcaceae	Phascolarctobacterium	Phascolarctobacterium_faecium
-0.0419663	0.931999	0.989641	Bacteria	Proteobacteria	Gammaproteobacteria	Burkholderiales	Oxalobacteraceae	Oxalobacter	Oxalobacter_formigenes
-0.0336524	0.954055	0.989641	Bacteria	Desulfobacterota	Desulfovibrionia	Desulfovibrionales	Desulfovibrionaceae	Bilophila	Bilophila_wadsworthia
-0.03066	0.961554	0.989641	Bacteria	Firmicutes	Clostridia	Lachnospirales	Lachnospiraceae	Howardella	Howardella_ureilytica
-0.0184714	0.983785	0.989641	Bacteria	Firmicutes	Clostridia	Lachnospirales	Lachnospiraceae	Lachnospiraceae NK4A136 group	Lachnospiraceae NK4A136 group_bacterium
0.00985493	0.989641	0.989641	Bacteria	Bacteroidota	Bacteroidia	Bacteroidales	Bacteroidaceae	Bacteroides	Bacteroides_uniformis
0.0210716	0.976288	0.989641	Bacteria	Bacteroidota	Bacteroidia	Bacteroidales	Marinifilaceae	Butyricimonas	Butyricimonas_faecihominis
0.0565547	0.935377	0.989641	Bacteria	Bacteroidota	Bacteroidia	Bacteroidales	Rikenellaceae	Alistipes	Alistipes_indistinctus
0.0577028	0.959375	0.989641	Bacteria	Bacteroidota	Bacteroidia	Bacteroidales	Bacteroidaceae	Bacteroides	Bacteroides_plebeius
0.0687551	0.908041	0.989641	Bacteria	Firmicutes	Clostridia	Lachnospirales	Lachnospiraceae	Lachnospiraceae FCS020 group	Lachnospiraceae FCS020 group_bacterium
0.0766465	0.937128	0.989641	Bacteria	Firmicutes	Clostridia	Lachnospirales	Lachnospiraceae	Coprococcus	Coprococcus_eutactus
0.0808928	0.895292	0.989641	Bacteria	Bacteroidota	Bacteroidia	Bacteroidales	Rikenellaceae	Alistipes	Alistipes_ihumii
0.0910645	0.889952	0.989641	Bacteria	Firmicutes	Clostridia	Peptostreptococcales-Tissierellales	Peptostreptococcaceae	Terrisporobacter	Terrisporobacter_mayombei
0.0945582	0.882234	0.989641	Bacteria	Bacteroidota	Bacteroidia	Bacteroidales	Marinifilaceae	Butyricimonas	Butyricimonas_virosa
0.128649	0.893363	0.989641	Bacteria	Bacteroidota	Bacteroidia	Bacteroidales	Bacteroidaceae	Bacteroides	Bacteroides_eggerthii
0.133848	0.871068	0.989641	Bacteria	Firmicutes	Clostridia	Lachnospirales	Lachnospiraceae	Roseburia	Roseburia_inulinivorans
0.155241	0.883016	0.989641	Bacteria	Firmicutes	Clostridia	Oscillospirales	Ruminococcaceae	Ruminococcus	Ruminococcus_bicirculans
0.175076	0.845002	0.989641	Bacteria	Firmicutes	Clostridia	Oscillospirales	Oscillospiraceae	Flavonifractor	Flavonifractor_plautii
0.19259	0.840039	0.989641	Bacteria	Firmicutes	Bacilli	Erysipelotrichales	Erysipelotrichaceae	Turicibacter	Turicibacter_sanguinis
0.307493	0.703946	0.989641	Bacteria	Firmicutes	Clostridia	Oscillospirales	Ruminococcaceae	Faecalibacterium	Faecalibacterium_prausnitzii
0.50921	0.503766	0.913621	Bacteria	Firmicutes	Clostridia	Lachnospirales	Lachnospiraceae	Lachnoclostridium	Lachnoclostridium_edouardi
0.511915	0.454821	0.874656	Bacteria	Actinobacteriota	Coriobacteriia	Coriobacteriales	Eggerthellaceae	Adlercreutzia	Adlercreutzia_equolifaciens
0.565483	0.585051	0.975558	Bacteria	Firmicutes	Clostridia	Oscillospirales	Ruminococcaceae	Subdoligranulum	Subdoligranulum_variabile
0.603176	0.544205	0.949194	Bacteria	Bacteroidota	Bacteroidia	Bacteroidales	Barnesiellaceae	Barnesiella	Barnesiella_intestinihominis
0.62183	0.411201	0.833516	Bacteria	Proteobacteria	Gammaproteobacteria	Enterobacterales	Pasteurellaceae	Haemophilus	Haemophilus_parainfluenzae
0.666011	0.448903	0.874656	Bacteria	Firmicutes	Clostridia	Lachnospirales	Lachnospiraceae	Butyrivibrio	Butyrivibrio_crossotus
0.823116	0.228724	0.612655	Bacteria	Firmicutes	Clostridia	Lachnospirales	Lachnospiraceae	Fusicatenibacter	Fusicatenibacter_saccharivorans
0.872987	0.195287	0.563328	Bacteria	Actinobacteriota	Coriobacteriia	Coriobacteriales	Eggerthellaceae	Slackia	Slackia_isoflavoniconvertens
0.883934	0.353036	0.820358	Bacteria	Actinobacteriota	Actinobacteria	Bifidobacteriales	Bifidobacteriaceae	Bifidobacterium	Bifidobacterium_longum
0.911167	0.206048	0.572355	Bacteria	Firmicutes	Clostridia	Lachnospirales	Lachnospiraceae	Anaerostipes	Anaerostipes_hadrus
0.947627	0.126497	0.453916	Bacteria	Firmicutes	Negativicutes	Veillonellales-Selenomonadales	Veillonellaceae	Allisonella	Allisonella_histaminiformans
0.963306	0.0938118	0.429174	Bacteria	Firmicutes	Clostridia	Lachnospirales	Lachnospiraceae	Dorea	Dorea_longicatena
0.975089	0.362505	0.820358	Bacteria	Bacteroidota	Bacteroidia	Bacteroidales	Bacteroidaceae	Bacteroides	Bacteroides_caccae
0.994026	0.0690966	0.37016	Bacteria	Bacteroidota	Bacteroidia	Bacteroidales	Barnesiellaceae	Coprobacter	Coprobacter_fastidiosus
1.02481	0.272708	0.70528	Bacteria	Bacteroidota	Bacteroidia	Bacteroidales	Rikenellaceae	Alistipes	Alistipes_shahii
1.06354	0.0934427	0.429174	Bacteria	Actinobacteriota	Coriobacteriia	Coriobacteriales	Coriobacteriaceae	Collinsella	Collinsella_aerofaciens
1.11371	0.133662	0.455668	Bacteria	Actinobacteriota	Coriobacteriia	Coriobacteriales	Eggerthellaceae	Senegalimassilia	Senegalimassilia_anaerobia
1.22471	0.104251	0.429174	Bacteria	Firmicutes	Clostridia	Oscillospirales	Butyricicoccaceae	Butyricicoccus	Butyricicoccus_faecihominis
1.28843	0.127096	0.453916	Bacteria	Firmicutes	Bacilli	Erysipelotrichales	Erysipelatoclostridiaceae	Erysipelotrichaceae UCG-003	Erysipelotrichaceae UCG-003_bacterium
1.3728	0.108724	0.429174	Bacteria	Firmicutes	Clostridia	Lachnospirales	Lachnospiraceae	Coprococcus	Coprococcus_comes
1.46586	0.0652012	0.37016	Bacteria	Bacteroidota	Bacteroidia	Bacteroidales	Rikenellaceae	Alistipes	Alistipes_inops
1.55898	0.0118948	0.297369	Bacteria	Firmicutes	Clostridia	Lachnospirales	Lachnospiraceae	Blautia	Blautia_massiliensis
1.64315	0.0677606	0.37016	Bacteria	Firmicutes	Clostridia	Peptostreptococcales-Tissierellales	Peptostreptococcaceae	Romboutsia	Romboutsia_timonensis
1.69468	0.0358128	0.348372	Bacteria	Firmicutes	Clostridia	Oscillospirales	Ruminococcaceae	Ruminococcus	Ruminococcus_callidus
1.86728	0.108289	0.429174	Bacteria	Bacteroidota	Bacteroidia	Bacteroidales	Bacteroidaceae	Bacteroides	Bacteroides_coprocola
1.90521	0.0250454	0.348372	Bacteria	Firmicutes	Clostridia	Lachnospirales	Lachnospiraceae	Blautia	Blautia_obeum
1.93246	0.0327315	0.348372	Bacteria	Firmicutes	Clostridia	Lachnospirales	Lachnospiraceae	Roseburia	Roseburia_intestinalis
1.95811	0.0254905	0.348372	Bacteria	Firmicutes	Clostridia	Lachnospirales	Lachnospiraceae	Dorea	Dorea_formicigenerans
2.02169	0.0406052	0.348372	Bacteria	Firmicutes	Clostridia	Peptostreptococcales-Tissierellales	Peptostreptococcaceae	Intestinibacter	Intestinibacter_bartlettii
2.14272	0.0439584	0.348372	Bacteria	Actinobacteriota	Actinobacteria	Bifidobacteriales	Bifidobacteriaceae	Bifidobacterium	Bifidobacterium_bifidum
2.23128	0.00689712	0.258642	Bacteria	Firmicutes	Clostridia	Lachnospirales	Lachnospiraceae	Blautia	Blautia_faecis
2.7727	0.00538917	0.258642	Bacteria	Firmicutes	Clostridia	Lachnospirales	Lachnospiraceae	Blautia	Blautia_wexlerae

## Sheet: Linda_results_Genus_HvsP
log2FoldChange	pvalue	padj	Kingdom	Phylum	Class	Order	Family	Genus
-13.4149	0.00164692	0.0321149	Bacteria	Firmicutes	Bacilli	Lactobacillales	Lactobacillaceae	Ligilactobacillus
-10.7261	0.0195368	0.207801	Bacteria	Firmicutes	Bacilli	Erysipelotrichales	Erysipelatoclostridiaceae	Catenibacterium
-10.0602	0.00324394	0.0474426	Bacteria	Firmicutes	Negativicutes	Acidaminococcales	Acidaminococcaceae	Acidaminococcus
-7.61041	0.175483	0.684384	Bacteria	Bacteroidota	Bacteroidia	Bacteroidales	Prevotellaceae	Prevotella_9
-7.47752	0.0364474	0.277843	Bacteria	Actinobacteriota	Actinobacteria	Bifidobacteriales	Bifidobacteriaceae	Bifidobacterium
-6.73028	0.0191665	0.207801	Bacteria	Firmicutes	Clostridia	Peptostreptococcales-Tissierellales	Anaerovoracaceae	Mogibacterium
-6.26548	0.011061	0.143793	Bacteria	Firmicutes	Clostridia	Lachnospirales	Lachnospiraceae	GCA-900066575
-5.44147	0.0950226	0.463235	Bacteria	Actinobacteriota	Coriobacteriia	Coriobacteriales	Eggerthellaceae	Enterorhabdus
-5.25986	0.0379956	0.277843	Bacteria	Actinobacteriota	Coriobacteriia	Coriobacteriales	Atopobiaceae	Olsenella
-5.19529	0.0924233	0.463235	Bacteria	Firmicutes	Clostridia	Lachnospirales	Lachnospiraceae	Lachnoclostridium
-5.17999	0.02949	0.251896	Bacteria	Actinobacteriota	Coriobacteriia	Coriobacteriales	Coriobacteriaceae	Collinsella
-4.80671	0.238796	0.78287	Bacteria	Proteobacteria	Gammaproteobacteria	Burkholderiales	Sutterellaceae	Sutterella
-4.62022	0.173316	0.684384	Bacteria	Firmicutes	Clostridia	Lachnospirales	Lachnospiraceae	Lachnospiraceae UCG-004
-4.49	0.105069	0.48093	Bacteria	Actinobacteriota	Coriobacteriia	Coriobacteriales	Eggerthellaceae	Slackia
-4.20066	0.0301414	0.251896	Bacteria	Firmicutes	Clostridia	Lachnospirales	Defluviitaleaceae	Defluviitaleaceae UCG-011
-4.12342	0.0487504	0.316878	Bacteria	Firmicutes	Clostridia	Oscillospirales	Ruminococcaceae	Faecalibacterium
-3.99806	0.285356	0.855543	Bacteria	Firmicutes	Clostridia	Lachnospirales	Lachnospiraceae	[Ruminococcus] gnavus group
-3.99038	0.247574	0.78287	Bacteria	Firmicutes	Clostridia	Lachnospirales	Lachnospiraceae	Lachnospira
-3.98534	0.380381	0.893996	Bacteria	Bacteroidota	Bacteroidia	Bacteroidales	Prevotellaceae	Paraprevotella
-3.90879	0.23594	0.78287	Bacteria	Actinobacteriota	Coriobacteriia	Coriobacteriales	Eggerthellaceae	Adlercreutzia
-3.83199	0.0773005	0.411098	Bacteria	Patescibacteria	Saccharimonadia	Saccharimonadales	Saccharimonadaceae	TM7x
-3.43531	0.198613	0.749603	Bacteria	Firmicutes	Clostridia	Oscillospirales	Ruminococcaceae	Incertae Sedis
-3.3884	0.323591	0.855543	Bacteria	Firmicutes	Clostridia	Clostridiales	Clostridiaceae	Clostridium sensu stricto 1
-3.21425	0.242501	0.78287	Bacteria	Firmicutes	Clostridia	Lachnospirales	Lachnospiraceae	Agathobacter
-3.09463	0.121229	0.506565	Bacteria	Firmicutes	Clostridia	Peptostreptococcales-Tissierellales	Anaerovoracaceae	Family XIII AD3011 group
-2.93024	0.327373	0.855543	Bacteria	Firmicutes	Clostridia	Lachnospirales	Lachnospiraceae	[Eubacterium] ventriosum group
-2.84276	0.274649	0.845631	Bacteria	Bacteroidota	Bacteroidia	Bacteroidales	Bacteroidaceae	Bacteroides
-2.83151	0.370735	0.893996	Bacteria	Firmicutes	Clostridia	Oscillospirales	Ruminococcaceae	Ruminococcus
-2.81378	0.389849	0.893996	Bacteria	Firmicutes	Clostridia	Peptostreptococcales-Tissierellales	Peptostreptococcaceae	Romboutsia
-2.67164	0.395864	0.893996	Bacteria	Bacteroidota	Bacteroidia	Bacteroidales	Tannerellaceae	Parabacteroides
-2.58886	0.466429	0.909536	Bacteria	Firmicutes	Clostridia	Oscillospirales	Oscillospiraceae	Flavonifractor
-2.42864	0.31375	0.855543	Bacteria	Firmicutes	Bacilli	Lactobacillales	Lactobacillaceae	Lactobacillus
-2.38349	0.436214	0.893996	Bacteria	Firmicutes	Clostridia	Lachnospirales	Lachnospiraceae	Lachnospiraceae NK4A136 group
-2.37112	0.559947	0.954943	Bacteria	Firmicutes	Clostridia	Peptostreptococcales-Tissierellales	Peptostreptococcaceae	Intestinibacter
-1.98965	0.512145	0.954943	Bacteria	Firmicutes	Negativicutes	Veillonellales-Selenomonadales	Veillonellaceae	Veillonella
-1.96062	0.41033	0.893996	Bacteria	Firmicutes	Clostridia	Oscillospirales	Oscillospiraceae	Intestinimonas
-1.93831	0.546219	0.954943	Bacteria	Firmicutes	Clostridia	Oscillospirales	Oscillospiraceae	UCG-002
-1.84104	0.659115	0.954943	Bacteria	Bacteroidota	Bacteroidia	Bacteroidales	Barnesiellaceae	Barnesiella
-1.8381	0.570543	0.954943	Bacteria	Firmicutes	Clostridia	Lachnospirales	Lachnospiraceae	CAG-56
-1.71516	0.534016	0.954943	Bacteria	Firmicutes	Clostridia	Oscillospirales	Oscillospiraceae	Oscillibacter
-1.6812	0.589233	0.954943	Bacteria	Firmicutes	Clostridia	Oscillospirales	Oscillospiraceae	Oscillospira
-1.54373	0.463537	0.909536	Bacteria	Firmicutes	Clostridia	Lachnospirales	Lachnospiraceae	Blautia
-1.51045	0.503896	0.954943	Bacteria	Firmicutes	Clostridia	Oscillospirales	Butyricicoccaceae	Butyricicoccus
-1.4913	0.638134	0.954943	Bacteria	Bacteroidota	Bacteroidia	Bacteroidales	Marinifilaceae	Odoribacter
-1.47161	0.606787	0.954943	Bacteria	Bacteroidota	Bacteroidia	Bacteroidales	Rikenellaceae	Alistipes
-1.42688	0.621204	0.954943	Bacteria	Firmicutes	Clostridia	Oscillospirales	Ruminococcaceae	Negativibacillus
-1.31846	0.594553	0.954943	Bacteria	Firmicutes	Clostridia	Monoglobales	Monoglobaceae	Monoglobus
-1.0115	0.671561	0.954943	Bacteria	Actinobacteriota	Actinobacteria	Actinomycetales	Actinomycetaceae	Actinomyces
-0.974884	0.753793	0.954943	Bacteria	Firmicutes	Bacilli	Lactobacillales	Streptococcaceae	Streptococcus
-0.941062	0.798906	0.954943	Bacteria	Proteobacteria	Gammaproteobacteria	Burkholderiales	Sutterellaceae	Parasutterella
-0.708278	0.85927	0.954943	Bacteria	Bacteroidota	Bacteroidia	Bacteroidales	Prevotellaceae	Prevotella
-0.706706	0.742852	0.954943	Bacteria	Firmicutes	Clostridia	Lachnospirales	Lachnospiraceae	Syntrophococcus
-0.59323	0.783113	0.954943	Bacteria	Firmicutes	Clostridia	Oscillospirales	Butyricicoccaceae	UCG-009
-0.480638	0.845358	0.954943	Bacteria	Bacteroidota	Bacteroidia	Bacteroidales	Rikenellaceae	Rikenella
-0.447237	0.852682	0.954943	Bacteria	Firmicutes	Clostridia	Oscillospirales	Ruminococcaceae	Candidatus Soleaferrea
-0.383449	0.878953	0.954943	Bacteria	Firmicutes	Clostridia	Oscillospirales	Ruminococcaceae	UBA1819
-0.377187	0.867738	0.954943	Bacteria	Firmicutes	Clostridia	Lachnospirales	Lachnospiraceae	Roseburia
-0.322205	0.934764	0.985292	Bacteria	Proteobacteria	Gammaproteobacteria	Enterobacterales	Enterobacteriaceae	Escherichia-Shigella
-0.29596	0.876826	0.954943	Bacteria	Firmicutes	Clostridia	Lachnospirales	Lachnospiraceae	[Ruminococcus] torques group
-0.293407	0.861725	0.954943	Bacteria	Firmicutes	Clostridia	Oscillospirales	Ruminococcaceae	Paludicola
-0.276212	0.922519	0.981225	Bacteria	Firmicutes	Clostridia	Lachnospirales	Lachnospiraceae	Lachnospiraceae UCG-003
-0.161815	0.949221	0.990968	Bacteria	Firmicutes	Clostridia	Lachnospirales	Lachnospiraceae	Robinsoniella
-0.128726	0.973732	0.990968	Bacteria	Firmicutes	Negativicutes	Acidaminococcales	Acidaminococcaceae	Phascolarctobacterium
0.0239148	0.994435	0.994435	Bacteria	Bacteroidota	Bacteroidia	Bacteroidales	Prevotellaceae	Prevotella_7
0.0264182	0.991139	0.994435	Bacteria	Proteobacteria	Gammaproteobacteria	Burkholderiales	Oxalobacteraceae	Oxalobacter
0.13047	0.974028	0.990968	Bacteria	Bacteroidota	Bacteroidia	Bacteroidales	Prevotellaceae	Alloprevotella
0.147867	0.959988	0.990968	Bacteria	Firmicutes	Clostridia	Peptococcales	Peptococcaceae	Peptococcus
0.353889	0.889648	0.954943	Bacteria	Desulfobacterota	Desulfovibrionia	Desulfovibrionales	Desulfovibrionaceae	Bilophila
0.406873	0.882648	0.954943	Bacteria	Firmicutes	Clostridia	Peptostreptococcales-Tissierellales	Anaerovoracaceae	[Eubacterium] brachy group
0.605364	0.849765	0.954943	Bacteria	Firmicutes	Bacilli	Lactobacillales	Streptococcaceae	Lactococcus
0.656795	0.861	0.954943	Bacteria	Proteobacteria	Gammaproteobacteria	Enterobacterales	Pasteurellaceae	Haemophilus
0.679732	0.845435	0.954943	Bacteria	Actinobacteriota	Coriobacteriia	Coriobacteriales	Eggerthellaceae	Eggerthella
0.791	0.784044	0.954943	Bacteria	Firmicutes	Clostridia	Lachnospirales	Lachnospiraceae	Tuzzerella
0.808316	0.80951	0.954943	Bacteria	Actinobacteriota	Coriobacteriia	Coriobacteriales	Eggerthellaceae	Gordonibacter
0.965622	0.770787	0.954943	Bacteria	Firmicutes	Clostridia	Lachnospirales	Lachnospiraceae	Howardella
1.06019	0.769603	0.954943	Bacteria	Firmicutes	Clostridia	Peptostreptococcales-Tissierellales	Peptostreptococcaceae	Terrisporobacter
1.09062	0.686431	0.954943	Bacteria	Firmicutes	Negativicutes	Veillonellales-Selenomonadales	Veillonellaceae	Allisonella
1.12153	0.661857	0.954943	Bacteria	Firmicutes	Clostridia	Lachnospirales	Lachnospiraceae	Lachnospiraceae UCG-010
1.15253	0.70372	0.954943	Bacteria	Firmicutes	Clostridia	Lachnospirales	Lachnospiraceae	Anaerostignum
1.16296	0.733665	0.954943	Bacteria	Verrucomicrobiota	Verrucomicrobiae	Verrucomicrobiales	Akkermansiaceae	Akkermansia
1.26432	0.740756	0.954943	Bacteria	Proteobacteria	Gammaproteobacteria	Enterobacterales	Enterobacteriaceae	Klebsiella
1.29484	0.762082	0.954943	Bacteria	Firmicutes	Clostridia	Oscillospirales	Ruminococcaceae	CAG-352
1.31893	0.785768	0.954943	Bacteria	Firmicutes	Bacilli	Erysipelotrichales	Erysipelotrichaceae	Holdemanella
1.41607	0.763843	0.954943	Bacteria	Bacteroidota	Bacteroidia	Bacteroidales	Prevotellaceae	Prevotellaceae NK3B31 group
1.56528	0.652548	0.954943	Bacteria	Firmicutes	Clostridia	Lachnospirales	Lachnospiraceae	Butyrivibrio
1.73451	0.716788	0.954943	Bacteria	Firmicutes	Negativicutes	Veillonellales-Selenomonadales	Veillonellaceae	Dialister
1.73809	0.644714	0.954943	Bacteria	Firmicutes	Clostridia	Lachnospirales	Lachnospiraceae	Lachnospiraceae NC2004 group
1.75875	0.679134	0.954943	Bacteria	Firmicutes	Clostridia	Lachnospirales	Lachnospiraceae	[Eubacterium] ruminantium group
1.78007	0.703922	0.954943	Bacteria	Bacteroidota	Bacteroidia	Bacteroidales	Rikenellaceae	Rikenellaceae RC9 gut group
1.89165	0.612703	0.954943	Bacteria	Firmicutes	Bacilli	Erysipelotrichales	Erysipelatoclostridiaceae	Erysipelatoclostridium
2.10346	0.524022	0.954943	Bacteria	Actinobacteriota	Coriobacteriia	Coriobacteriales	Eggerthellaceae	Senegalimassilia
2.35835	0.329055	0.855543	Bacteria	Firmicutes	Clostridia	Peptostreptococcales-Tissierellales	Anaerovoracaceae	Family XIII UCG-001
2.37196	0.562012	0.954943	Bacteria	Desulfobacterota	Desulfovibrionia	Desulfovibrionales	Desulfovibrionaceae	Desulfovibrio
2.40001	0.427371	0.893996	Bacteria	Bacteroidota	Bacteroidia	Bacteroidales	Barnesiellaceae	Coprobacter
2.74523	0.436624	0.893996	Bacteria	Firmicutes	Clostridia	Lachnospirales	Lachnospiraceae	Tyzzerella
2.82778	0.372219	0.893996	Bacteria	Firmicutes	Clostridia	Oscillospirales	Oscillospiraceae	UCG-003
2.9522	0.383258	0.893996	Bacteria	Bacteroidota	Bacteroidia	Bacteroidales	Marinifilaceae	Butyricimonas
3.0978	0.41879	0.893996	Bacteria	Firmicutes	Clostridia	Lachnospirales	Lachnospiraceae	[Eubacterium] eligens group
3.11222	0.221574	0.78287	Bacteria	Firmicutes	Clostridia	Oscillospirales	Oscillospiraceae	Colidextribacter
3.15098	0.443178	0.893996	Bacteria	Firmicutes	Bacilli	Erysipelotrichales	Erysipelotrichaceae	Turicibacter
3.23155	0.401616	0.893996	Bacteria	Firmicutes	Clostridia	Oscillospirales	Ruminococcaceae	[Eubacterium] siraeum group
3.28778	0.328688	0.855543	Bacteria	Firmicutes	Clostridia	Lachnospirales	Lachnospiraceae	Lachnospiraceae UCG-001
3.44021	0.294738	0.855543	Bacteria	Firmicutes	Clostridia	Lachnospirales	Lachnospiraceae	[Eubacterium] xylanophilum group
3.54748	0.220358	0.78287	Bacteria	Firmicutes	Clostridia	Oscillospirales	Oscillospiraceae	UCG-005
4.43234	0.110984	0.48093	Bacteria	Firmicutes	Clostridia	Lachnospirales	Lachnospiraceae	Marvinbryantia
5.01919	0.107374	0.48093	Bacteria	Firmicutes	Clostridia	Oscillospirales	Oscillospiraceae	NK4A214 group
5.51056	0.028752	0.251896	Bacteria	Firmicutes	Clostridia	Lachnospirales	Lachnospiraceae	Lachnospiraceae FCS020 group
5.74492	0.0644716	0.377159	Bacteria	Firmicutes	Clostridia	Lachnospirales	Lachnospiraceae	Lachnospiraceae ND3007 group
6.37696	0.052067	0.320623	Bacteria	Firmicutes	Clostridia	Christensenellales	Christensenellaceae	Christensenellaceae R-7 group
6.40132	0.071153	0.396424	Bacteria	Firmicutes	Clostridia	Lachnospirales	Lachnospiraceae	[Ruminococcus] gauvreauii group
7.17485	0.0415923	0.286253	Bacteria	Firmicutes	Bacilli	Erysipelotrichales	Erysipelatoclostridiaceae	Erysipelotrichaceae UCG-003
7.56437	0.00107942	0.0252585	Bacteria	Firmicutes	Clostridia	Lachnospirales	Lachnospiraceae	Fusicatenibacter
8.63733	0.000194794	0.0113954	Bacteria	Firmicutes	Clostridia	Lachnospirales	Lachnospiraceae	[Eubacterium] hallii group
8.64597	0.000548092	0.0160317	Bacteria	Firmicutes	Clostridia	Oscillospirales	Ruminococcaceae	Subdoligranulum
8.70295	0.00266482	0.0445406	Bacteria	Firmicutes	Clostridia	Lachnospirales	Lachnospiraceae	Coprococcus
9.6503	0.000350502	0.0136696	Bacteria	Firmicutes	Clostridia	Lachnospirales	Lachnospiraceae	Anaerostipes
10.0651	7.80535e-09	9.13226e-07	Bacteria	Firmicutes	Clostridia	Lachnospirales	Lachnospiraceae	Dorea

## Sheet: Linda_results_Genus_HvsDT2
log2FoldChange	pvalue	padj	Kingdom	Phylum	Class	Order	Family	Genus
-12.0466	0.00721059	0.105455	Bacteria	Firmicutes	Bacilli	Lactobacillales	Lactobacillaceae	Ligilactobacillus
-10.8057	0.00292484	0.0877313	Bacteria	Firmicutes	Negativicutes	Acidaminococcales	Acidaminococcaceae	Acidaminococcus
-8.94167	0.00594855	0.0994258	Bacteria	Firmicutes	Clostridia	Lachnospirales	Lachnospiraceae	[Eubacterium] ventriosum group
-8.85306	0.0674892	0.311732	Bacteria	Firmicutes	Bacilli	Erysipelotrichales	Erysipelatoclostridiaceae	Catenibacterium
-7.70515	0.0421827	0.276362	Bacteria	Actinobacteriota	Actinobacteria	Bifidobacteriales	Bifidobacteriaceae	Bifidobacterium
-7.63902	0.0125224	0.162791	Bacteria	Firmicutes	Clostridia	Peptostreptococcales-Tissierellales	Anaerovoracaceae	Mogibacterium
-7.52575	0.0924209	0.370708	Bacteria	Bacteroidota	Bacteroidia	Bacteroidales	Barnesiellaceae	Barnesiella
-7.4508	0.00465593	0.0907906	Bacteria	Firmicutes	Clostridia	Lachnospirales	Lachnospiraceae	GCA-900066575
-7.41842	0.0037492	0.0877313	Bacteria	Actinobacteriota	Coriobacteriia	Coriobacteriales	Coriobacteriaceae	Collinsella
-7.36781	0.0347881	0.276362	Bacteria	Firmicutes	Clostridia	Lachnospirales	Lachnospiraceae	CAG-56
-7.20627	0.0502871	0.276362	Bacteria	Firmicutes	Clostridia	Clostridiales	Clostridiaceae	Clostridium sensu stricto 1
-7.01393	0.0436427	0.276362	Bacteria	Actinobacteriota	Coriobacteriia	Coriobacteriales	Eggerthellaceae	Enterorhabdus
-7.0135	0.04713	0.276362	Bacteria	Actinobacteriota	Coriobacteriia	Coriobacteriales	Eggerthellaceae	Adlercreutzia
-6.87784	0.0501976	0.276362	Bacteria	Firmicutes	Clostridia	Peptostreptococcales-Tissierellales	Peptostreptococcaceae	Romboutsia
-6.63028	0.0210591	0.223993	Bacteria	Firmicutes	Clostridia	Oscillospirales	Ruminococcaceae	Incertae Sedis
-6.60147	0.00346366	0.0877313	Bacteria	Firmicutes	Clostridia	Oscillospirales	Ruminococcaceae	Faecalibacterium
-6.16789	0.0880889	0.368086	Bacteria	Firmicutes	Clostridia	Lachnospirales	Lachnospiraceae	Lachnospiraceae UCG-004
-6.05311	0.00368233	0.0877313	Bacteria	Firmicutes	Clostridia	Lachnospirales	Defluviitaleaceae	Defluviitaleaceae UCG-011
-5.58575	0.0379828	0.276362	Bacteria	Actinobacteriota	Coriobacteriia	Coriobacteriales	Atopobiaceae	Olsenella
-5.47192	0.0950532	0.370708	Bacteria	Firmicutes	Clostridia	Lachnospirales	Lachnospiraceae	Lachnoclostridium
-5.27327	0.181412	0.544236	Bacteria	Proteobacteria	Gammaproteobacteria	Burkholderiales	Sutterellaceae	Parasutterella
-5.04488	0.395878	0.790242	Bacteria	Bacteroidota	Bacteroidia	Bacteroidales	Prevotellaceae	Prevotella_9
-5.02098	0.0301681	0.276362	Bacteria	Patescibacteria	Saccharimonadia	Saccharimonadales	Saccharimonadaceae	TM7x
-4.73551	0.0665365	0.311732	Bacteria	Firmicutes	Bacilli	Lactobacillales	Lactobacillaceae	Lactobacillus
-4.71776	0.0519654	0.276362	Bacteria	Firmicutes	Clostridia	Oscillospirales	Butyricicoccaceae	Butyricicoccus
-4.47701	0.127632	0.439205	Bacteria	Actinobacteriota	Coriobacteriia	Coriobacteriales	Eggerthellaceae	Slackia
-4.4466	0.304458	0.683335	Bacteria	Firmicutes	Clostridia	Peptostreptococcales-Tissierellales	Peptostreptococcaceae	Intestinibacter
-4.41892	0.0692738	0.311732	Bacteria	Firmicutes	Clostridia	Lachnospirales	Lachnospiraceae	Roseburia
-4.3656	0.0407602	0.276362	Bacteria	Firmicutes	Clostridia	Peptostreptococcales-Tissierellales	Anaerovoracaceae	Family XIII AD3011 group
-4.32728	0.198984	0.582029	Bacteria	Firmicutes	Clostridia	Oscillospirales	Ruminococcaceae	Ruminococcus
-4.155	0.0657982	0.311732	Bacteria	Firmicutes	Clostridia	Lachnospirales	Lachnospiraceae	Blautia
-4.08267	0.123338	0.43729	Bacteria	Firmicutes	Clostridia	Monoglobales	Monoglobaceae	Monoglobus
-4.06559	0.306104	0.683335	Bacteria	Firmicutes	Clostridia	Lachnospirales	Lachnospiraceae	[Ruminococcus] gnavus group
-3.98184	0.229823	0.625334	Bacteria	Firmicutes	Bacilli	Lactobacillales	Streptococcaceae	Streptococcus
-3.95426	0.176412	0.543163	Bacteria	Firmicutes	Clostridia	Lachnospirales	Lachnospiraceae	Agathobacter
-3.66412	0.273618	0.666943	Bacteria	Bacteroidota	Bacteroidia	Bacteroidales	Tannerellaceae	Parabacteroides
-3.58613	0.159462	0.504245	Bacteria	Actinobacteriota	Actinobacteria	Actinomycetales	Actinomycetaceae	Actinomyces
-3.42849	0.348741	0.739568	Bacteria	Firmicutes	Clostridia	Lachnospirales	Lachnospiraceae	Lachnospira
-3.36171	0.224227	0.624632	Bacteria	Bacteroidota	Bacteroidia	Bacteroidales	Bacteroidaceae	Bacteroides
-3.12436	0.309545	0.683335	Bacteria	Firmicutes	Clostridia	Oscillospirales	Ruminococcaceae	Negativibacillus
-2.80446	0.457529	0.831409	Bacteria	Firmicutes	Clostridia	Oscillospirales	Oscillospiraceae	Flavonifractor
-2.79538	0.269862	0.666943	Bacteria	Firmicutes	Clostridia	Oscillospirales	Oscillospiraceae	Intestinimonas
-2.44379	0.418761	0.790242	Bacteria	Firmicutes	Clostridia	Lachnospirales	Lachnospiraceae	Lachnospiraceae UCG-003
-2.42194	0.615027	0.910863	Bacteria	Bacteroidota	Bacteroidia	Bacteroidales	Prevotellaceae	Paraprevotella
-2.37489	0.486443	0.844014	Bacteria	Firmicutes	Clostridia	Oscillospirales	Oscillospiraceae	UCG-002
-2.14262	0.292453	0.683335	Bacteria	Firmicutes	Clostridia	Lachnospirales	Lachnospiraceae	[Ruminococcus] torques group
-2.06528	0.543275	0.889954	Bacteria	Firmicutes	Bacilli	Lactobacillales	Streptococcaceae	Lactococcus
-2.02683	0.504698	0.85006	Bacteria	Bacteroidota	Bacteroidia	Bacteroidales	Rikenellaceae	Alistipes
-2.02113	0.490538	0.844014	Bacteria	Firmicutes	Clostridia	Peptostreptococcales-Tissierellales	Anaerovoracaceae	[Eubacterium] brachy group
-1.98944	0.26803	0.666943	Bacteria	Firmicutes	Clostridia	Oscillospirales	Ruminococcaceae	Paludicola
-1.9712	0.465846	0.831409	Bacteria	Firmicutes	Clostridia	Lachnospirales	Lachnospiraceae	Robinsoniella
-1.96165	0.438363	0.814102	Bacteria	Proteobacteria	Gammaproteobacteria	Burkholderiales	Oxalobacteraceae	Oxalobacter
-1.89798	0.469	0.831409	Bacteria	Bacteroidota	Bacteroidia	Bacteroidales	Rikenellaceae	Rikenella
-1.4993	0.644188	0.919146	Bacteria	Firmicutes	Clostridia	Lachnospirales	Lachnospiraceae	Lachnospiraceae NK4A136 group
-1.37151	0.549357	0.889954	Bacteria	Firmicutes	Clostridia	Oscillospirales	Butyricicoccaceae	UCG-009
-1.30161	0.569616	0.889954	Bacteria	Firmicutes	Clostridia	Lachnospirales	Lachnospiraceae	Syntrophococcus
-1.29146	0.736899	0.933283	Bacteria	Firmicutes	Clostridia	Peptostreptococcales-Tissierellales	Peptostreptococcaceae	Terrisporobacter
-1.17971	0.725977	0.933283	Bacteria	Bacteroidota	Bacteroidia	Bacteroidales	Marinifilaceae	Odoribacter
-1.07487	0.713368	0.933283	Bacteria	Firmicutes	Clostridia	Oscillospirales	Oscillospiraceae	Oscillibacter
-1.04231	0.809041	0.946579	Bacteria	Proteobacteria	Gammaproteobacteria	Burkholderiales	Sutterellaceae	Sutterella
-1.00637	0.754592	0.933283	Bacteria	Firmicutes	Negativicutes	Veillonellales-Selenomonadales	Veillonellaceae	Veillonella
-0.841558	0.839372	0.950887	Bacteria	Firmicutes	Negativicutes	Acidaminococcales	Acidaminococcaceae	Phascolarctobacterium
-0.748991	0.769687	0.933283	Bacteria	Firmicutes	Clostridia	Peptostreptococcales-Tissierellales	Anaerovoracaceae	Family XIII UCG-001
-0.713158	0.789701	0.933283	Bacteria	Firmicutes	Clostridia	Oscillospirales	Ruminococcaceae	UBA1819
-0.505559	0.907577	0.981006	Bacteria	Firmicutes	Bacilli	Erysipelotrichales	Erysipelotrichaceae	Turicibacter
-0.397295	0.904263	0.981006	Bacteria	Firmicutes	Clostridia	Oscillospirales	Oscillospiraceae	Oscillospira
-0.278043	0.951169	0.988931	Bacteria	Firmicutes	Clostridia	Oscillospirales	Ruminococcaceae	CAG-352
-0.249652	0.936425	0.988931	Bacteria	Firmicutes	Clostridia	Peptococcales	Peptococcaceae	Peptococcus
-0.161352	0.955122	0.988931	Bacteria	Firmicutes	Negativicutes	Veillonellales-Selenomonadales	Veillonellaceae	Allisonella
-0.0664576	0.985628	0.997216	Bacteria	Firmicutes	Clostridia	Lachnospirales	Lachnospiraceae	Butyrivibrio
-0.0472429	0.98961	0.997216	Bacteria	Verrucomicrobiota	Verrucomicrobiae	Verrucomicrobiales	Akkermansiaceae	Akkermansia
0.00892144	0.997216	0.997216	Bacteria	Firmicutes	Clostridia	Oscillospirales	Ruminococcaceae	Candidatus Soleaferrea
0.115038	0.974222	0.997216	Bacteria	Actinobacteriota	Coriobacteriia	Coriobacteriales	Eggerthellaceae	Gordonibacter
0.183782	0.946156	0.988931	Bacteria	Firmicutes	Clostridia	Lachnospirales	Lachnospiraceae	Lachnospiraceae UCG-010
0.292729	0.913928	0.981006	Bacteria	Desulfobacterota	Desulfovibrionia	Desulfovibrionales	Desulfovibrionaceae	Bilophila
0.553391	0.881183	0.972626	Bacteria	Actinobacteriota	Coriobacteriia	Coriobacteriales	Eggerthellaceae	Eggerthella
0.589538	0.840414	0.950887	Bacteria	Firmicutes	Clostridia	Lachnospirales	Lachnospiraceae	Marvinbryantia
0.596987	0.852207	0.950887	Bacteria	Bacteroidota	Bacteroidia	Bacteroidales	Barnesiellaceae	Coprobacter
0.739346	0.85336	0.950887	Bacteria	Firmicutes	Clostridia	Lachnospirales	Lachnospiraceae	Lachnospiraceae NC2004 group
0.850805	0.850461	0.950887	Bacteria	Firmicutes	Clostridia	Lachnospirales	Lachnospiraceae	[Eubacterium] ruminantium group
0.950221	0.784464	0.933283	Bacteria	Firmicutes	Clostridia	Lachnospirales	Lachnospiraceae	[Eubacterium] xylanophilum group
1.00719	0.786902	0.933283	Bacteria	Firmicutes	Clostridia	Lachnospirales	Lachnospiraceae	[Ruminococcus] gauvreauii group
1.12999	0.786952	0.933283	Bacteria	Proteobacteria	Gammaproteobacteria	Enterobacterales	Enterobacteriaceae	Escherichia-Shigella
1.13729	0.665848	0.922656	Bacteria	Firmicutes	Clostridia	Lachnospirales	Lachnospiraceae	Lachnospiraceae FCS020 group
1.15801	0.776678	0.933283	Bacteria	Firmicutes	Clostridia	Oscillospirales	Ruminococcaceae	[Eubacterium] siraeum group
1.216	0.74156	0.933283	Bacteria	Firmicutes	Bacilli	Erysipelotrichales	Erysipelatoclostridiaceae	Erysipelotrichaceae UCG-003
1.22431	0.736791	0.933283	Bacteria	Bacteroidota	Bacteroidia	Bacteroidales	Prevotellaceae	Prevotella_7
1.30439	0.743367	0.933283	Bacteria	Proteobacteria	Gammaproteobacteria	Enterobacterales	Pasteurellaceae	Haemophilus
1.41318	0.721619	0.933283	Bacteria	Firmicutes	Bacilli	Erysipelotrichales	Erysipelatoclostridiaceae	Erysipelatoclostridium
1.51764	0.670306	0.922656	Bacteria	Firmicutes	Clostridia	Lachnospirales	Lachnospiraceae	Lachnospiraceae UCG-001
1.61732	0.66559	0.922656	Bacteria	Firmicutes	Clostridia	Lachnospirales	Lachnospiraceae	Tyzzerella
1.96617	0.576693	0.889954	Bacteria	Firmicutes	Clostridia	Lachnospirales	Lachnospiraceae	Howardella
2.03929	0.638595	0.919146	Bacteria	Desulfobacterota	Desulfovibrionia	Desulfovibrionales	Desulfovibrionaceae	Desulfovibrio
2.04864	0.614103	0.910863	Bacteria	Firmicutes	Clostridia	Lachnospirales	Lachnospiraceae	[Eubacterium] eligens group
2.09305	0.623117	0.911309	Bacteria	Bacteroidota	Bacteroidia	Bacteroidales	Prevotellaceae	Alloprevotella
2.31761	0.508583	0.85006	Bacteria	Actinobacteriota	Coriobacteriia	Coriobacteriales	Eggerthellaceae	Senegalimassilia
2.50051	0.353981	0.739568	Bacteria	Firmicutes	Clostridia	Oscillospirales	Oscillospiraceae	Colidextribacter
2.50577	0.414558	0.790242	Bacteria	Firmicutes	Clostridia	Lachnospirales	Lachnospiraceae	Tuzzerella
2.7301	0.585696	0.889954	Bacteria	Bacteroidota	Bacteroidia	Bacteroidales	Prevotellaceae	Prevotellaceae NK3B31 group
2.84632	0.580978	0.889954	Bacteria	Firmicutes	Bacilli	Erysipelotrichales	Erysipelotrichaceae	Holdemanella
2.8796	0.562883	0.889954	Bacteria	Bacteroidota	Bacteroidia	Bacteroidales	Rikenellaceae	Rikenellaceae RC9 gut group
3.07665	0.34032	0.73736	Bacteria	Firmicutes	Clostridia	Lachnospirales	Lachnospiraceae	Anaerostignum
3.27022	0.363172	0.745458	Bacteria	Bacteroidota	Bacteroidia	Bacteroidales	Marinifilaceae	Butyricimonas
3.27456	0.286108	0.683155	Bacteria	Firmicutes	Clostridia	Oscillospirales	Oscillospiraceae	UCG-005
3.33512	0.412051	0.790242	Bacteria	Proteobacteria	Gammaproteobacteria	Enterobacterales	Enterobacteriaceae	Klebsiella
3.47292	0.413975	0.790242	Bacteria	Bacteroidota	Bacteroidia	Bacteroidales	Prevotellaceae	Prevotella
3.50779	0.141366	0.472567	Bacteria	Firmicutes	Clostridia	Lachnospirales	Lachnospiraceae	Fusicatenibacter
3.71295	0.256939	0.666943	Bacteria	Firmicutes	Clostridia	Lachnospirales	Lachnospiraceae	Lachnospiraceae ND3007 group
3.73191	0.114623	0.419091	Bacteria	Firmicutes	Clostridia	Lachnospirales	Lachnospiraceae	[Eubacterium] hallii group
3.74963	0.255185	0.666943	Bacteria	Firmicutes	Clostridia	Oscillospirales	Oscillospiraceae	NK4A214 group
4.15333	0.21826	0.622839	Bacteria	Firmicutes	Clostridia	Oscillospirales	Oscillospiraceae	UCG-003
4.88827	0.158245	0.504245	Bacteria	Firmicutes	Clostridia	Christensenellales	Christensenellaceae	Christensenellaceae R-7 group
5.18734	0.0850341	0.368086	Bacteria	Firmicutes	Clostridia	Lachnospirales	Lachnospiraceae	Coprococcus
5.46376	0.0347287	0.276362	Bacteria	Firmicutes	Clostridia	Oscillospirales	Ruminococcaceae	Subdoligranulum
6.65159	0.0173503	0.202998	Bacteria	Firmicutes	Clostridia	Lachnospirales	Lachnospiraceae	Anaerostipes
7.43677	2.16796e-05	0.00253651	Bacteria	Firmicutes	Clostridia	Lachnospirales	Lachnospiraceae	Dorea
8.33835	0.103519	0.390703	Bacteria	Firmicutes	Negativicutes	Veillonellales-Selenomonadales	Veillonellaceae	Dialister

## Sheet: Linda_results_Genus_PvsDT2
log2FoldChange	pvalue	padj	Kingdom	Phylum	Class	Order	Family	Genus
-5.00785	0.0011592	0.0678133	Bacteria	Firmicutes	Clostridia	Lachnospirales	Lachnospiraceae	[Eubacterium] ventriosum group
-4.95527	0.00529111	0.125412	Bacteria	Firmicutes	Bacilli	Erysipelotrichales	Erysipelatoclostridiaceae	Erysipelotrichaceae UCG-003
-4.68113	0.0267818	0.261123	Bacteria	Bacteroidota	Bacteroidia	Bacteroidales	Barnesiellaceae	Barnesiella
-4.52613	0.00624808	0.125412	Bacteria	Firmicutes	Clostridia	Lachnospirales	Lachnospiraceae	CAG-56
-4.39055	0.0138971	0.162596	Bacteria	Firmicutes	Clostridia	Lachnospirales	Lachnospiraceae	[Ruminococcus] gauvreauii group
-3.90184	0.000661005	0.0678133	Bacteria	Firmicutes	Clostridia	Lachnospirales	Lachnospiraceae	[Eubacterium] hallii group
-3.36969	0.00776036	0.125412	Bacteria	Firmicutes	Clostridia	Lachnospirales	Lachnospiraceae	Lachnospiraceae FCS020 group
-3.32863	0.0736108	0.421749	Bacteria	Proteobacteria	Gammaproteobacteria	Burkholderiales	Sutterellaceae	Parasutterella
-3.06049	0.0629559	0.409213	Bacteria	Firmicutes	Clostridia	Peptostreptococcales-Tissierellales	Peptostreptococcaceae	Romboutsia
-3.053	0.00734727	0.125412	Bacteria	Firmicutes	Clostridia	Lachnospirales	Lachnospiraceae	Fusicatenibacter
-3.03816	0.00857518	0.125412	Bacteria	Firmicutes	Clostridia	Lachnospirales	Lachnospiraceae	Roseburia
-2.83922	0.0415957	0.347622	Bacteria	Firmicutes	Clostridia	Lachnospirales	Lachnospiraceae	Marvinbryantia
-2.81429	0.101888	0.496704	Bacteria	Firmicutes	Clostridia	Clostridiales	Clostridiaceae	Clostridium sensu stricto 1
-2.65296	0.19672	0.5931	Bacteria	Firmicutes	Bacilli	Erysipelotrichales	Erysipelotrichaceae	Turicibacter
-2.51203	0.0756986	0.421749	Bacteria	Firmicutes	Clostridia	Lachnospirales	Lachnospiraceae	Coprococcus
-2.20373	0.0530042	0.405451	Bacteria	Firmicutes	Clostridia	Oscillospirales	Butyricicoccaceae	Butyricicoccus
-2.19139	0.101031	0.496704	Bacteria	Firmicutes	Clostridia	Oscillospirales	Ruminococcaceae	Incertae Sedis
-2.17863	0.0715631	0.421749	Bacteria	Firmicutes	Clostridia	Oscillospirales	Ruminococcaceae	Subdoligranulum
-2.10376	0.0827446	0.440051	Bacteria	Firmicutes	Clostridia	Peptostreptococcales-Tissierellales	Anaerovoracaceae	Family XIII UCG-001
-2.10113	0.201386	0.5931	Bacteria	Actinobacteriota	Coriobacteriia	Coriobacteriales	Eggerthellaceae	Adlercreutzia
-2.00338	0.198227	0.5931	Bacteria	Firmicutes	Bacilli	Lactobacillales	Streptococcaceae	Streptococcus
-1.99514	0.123953	0.553913	Bacteria	Firmicutes	Clostridia	Lachnospirales	Lachnospiraceae	Anaerostipes
-1.76063	0.156202	0.571115	Bacteria	Firmicutes	Clostridia	Monoglobales	Monoglobaceae	Monoglobus
-1.66707	0.296905	0.678163	Bacteria	Firmicutes	Bacilli	Lactobacillales	Streptococcaceae	Lactococcus
-1.62474	0.0379322	0.341389	Bacteria	Firmicutes	Clostridia	Lachnospirales	Lachnospiraceae	Dorea
-1.60769	0.127826	0.553913	Bacteria	Firmicutes	Clostridia	Lachnospirales	Lachnospiraceae	Blautia
-1.57105	0.188621	0.5931	Bacteria	Actinobacteriota	Actinobacteria	Actinomycetales	Actinomycetaceae	Actinomyces
-1.48641	0.363121	0.750009	Bacteria	Firmicutes	Clostridia	Lachnospirales	Lachnospiraceae	[Eubacterium] xylanophilum group
-1.47448	0.154595	0.571115	Bacteria	Firmicutes	Clostridia	Oscillospirales	Ruminococcaceae	Faecalibacterium
-1.42443	0.301406	0.678163	Bacteria	Firmicutes	Clostridia	Peptostreptococcales-Tissierellales	Anaerovoracaceae	[Eubacterium] brachy group
-1.34808	0.455526	0.790333	Bacteria	Firmicutes	Clostridia	Peptostreptococcales-Tissierellales	Peptostreptococcaceae	Terrisporobacter
-1.30329	0.278208	0.678132	Bacteria	Firmicutes	Bacilli	Lactobacillales	Lactobacillaceae	Lactobacillus
-1.23484	0.291577	0.678163	Bacteria	Actinobacteriota	Coriobacteriia	Coriobacteriales	Coriobacteriaceae	Collinsella
-1.164	0.411805	0.764782	Bacteria	Firmicutes	Clostridia	Lachnospirales	Lachnospiraceae	Lachnospiraceae UCG-003
-1.07191	0.596817	0.921877	Bacteria	Firmicutes	Clostridia	Peptostreptococcales-Tissierellales	Peptostreptococcaceae	Intestinibacter
-1.06996	0.576778	0.921877	Bacteria	Firmicutes	Clostridia	Oscillospirales	Ruminococcaceae	[Eubacterium] siraeum group
-1.02839	0.502158	0.851485	Bacteria	Firmicutes	Clostridia	Lachnospirales	Lachnospiraceae	Lachnospiraceae ND3007 group
-0.984489	0.407318	0.764782	Bacteria	Proteobacteria	Gammaproteobacteria	Burkholderiales	Oxalobacteraceae	Oxalobacter
-0.848874	0.372739	0.750009	Bacteria	Firmicutes	Clostridia	Lachnospirales	Defluviitaleaceae	Defluviitaleaceae UCG-011
-0.843078	0.376801	0.750009	Bacteria	Firmicutes	Clostridia	Lachnospirales	Lachnospiraceae	[Ruminococcus] torques group
-0.805802	0.525036	0.87756	Bacteria	Firmicutes	Clostridia	Lachnospirales	Lachnospiraceae	Robinsoniella
-0.799449	0.595251	0.921877	Bacteria	Bacteroidota	Bacteroidia	Bacteroidales	Barnesiellaceae	Coprobacter
-0.76657	0.646782	0.92821	Bacteria	Firmicutes	Clostridia	Lachnospirales	Lachnospiraceae	Lachnospiraceae UCG-001
-0.693903	0.629589	0.92647	Bacteria	Firmicutes	Clostridia	Oscillospirales	Ruminococcaceae	Negativibacillus
-0.692457	0.410413	0.764782	Bacteria	Firmicutes	Clostridia	Oscillospirales	Ruminococcaceae	Paludicola
-0.628161	0.716825	0.93098	Bacteria	Firmicutes	Clostridia	Lachnospirales	Lachnospiraceae	Butyrivibrio
-0.569303	0.789343	0.93286	Bacteria	Firmicutes	Clostridia	Oscillospirales	Ruminococcaceae	CAG-352
-0.568887	0.723692	0.93098	Bacteria	Actinobacteriota	Coriobacteriia	Coriobacteriales	Eggerthellaceae	Enterorhabdus
-0.544094	0.746116	0.93098	Bacteria	Firmicutes	Clostridia	Lachnospirales	Lachnospiraceae	Lachnospiraceae UCG-004
-0.492191	0.754262	0.93098	Bacteria	Firmicutes	Clostridia	Oscillospirales	Ruminococcaceae	Ruminococcus
-0.485115	0.763881	0.93098	Bacteria	Firmicutes	Clostridia	Christensenellales	Christensenellaceae	Christensenellaceae R-7 group
-0.413761	0.736197	0.93098	Bacteria	Bacteroidota	Bacteroidia	Bacteroidales	Rikenellaceae	Rikenella
-0.267386	0.786477	0.93286	Bacteria	Firmicutes	Clostridia	Peptostreptococcales-Tissierellales	Anaerovoracaceae	Family XIII AD3011 group
-0.265982	0.862835	0.951678	Bacteria	Firmicutes	Clostridia	Oscillospirales	Oscillospiraceae	NK4A214 group
-0.248389	0.853535	0.951678	Bacteria	Firmicutes	Negativicutes	Veillonellales-Selenomonadales	Veillonellaceae	Allisonella
-0.206629	0.903396	0.960885	Bacteria	Verrucomicrobiota	Verrucomicrobiae	Verrucomicrobiales	Akkermansiaceae	Akkermansia
-0.185409	0.862348	0.951678	Bacteria	Patescibacteria	Saccharimonadia	Saccharimonadales	Saccharimonadaceae	TM7x
-0.181737	0.879781	0.951678	Bacteria	Firmicutes	Clostridia	Lachnospirales	Lachnospiraceae	GCA-900066575
-0.124338	0.943511	0.988419	Bacteria	Firmicutes	Clostridia	Lachnospirales	Lachnospiraceae	Tyzzerella
-0.0455832	0.980908	0.997944	Bacteria	Firmicutes	Clostridia	Lachnospirales	Lachnospiraceae	[Eubacterium] eligens group
0.00483627	0.997944	0.997944	Bacteria	Firmicutes	Clostridia	Lachnospirales	Lachnospiraceae	Lachnospiraceae NC2004 group
0.0110963	0.994339	0.997944	Bacteria	Bacteroidota	Bacteroidia	Bacteroidales	Tannerellaceae	Parabacteroides
0.0658325	0.958882	0.98934	Bacteria	Firmicutes	Clostridia	Lachnospirales	Lachnospiraceae	Lachnospiraceae UCG-010
0.0948298	0.946179	0.988419	Bacteria	Firmicutes	Clostridia	Peptostreptococcales-Tissierellales	Anaerovoracaceae	Mogibacterium
0.0956368	0.963972	0.98934	Bacteria	Firmicutes	Clostridia	Lachnospirales	Lachnospiraceae	[Eubacterium] ruminantium group
0.168821	0.886606	0.951678	Bacteria	Firmicutes	Clostridia	Oscillospirales	Oscillospiraceae	Intestinimonas
0.225297	0.833799	0.951678	Bacteria	Firmicutes	Clostridia	Oscillospirales	Butyricicoccaceae	UCG-009
0.258065	0.875899	0.951678	Bacteria	Firmicutes	Negativicutes	Acidaminococcales	Acidaminococcaceae	Acidaminococcus
0.263569	0.846781	0.951678	Bacteria	Firmicutes	Clostridia	Lachnospirales	Lachnospiraceae	Agathobacter
0.290746	0.881354	0.951678	Bacteria	Firmicutes	Negativicutes	Acidaminococcales	Acidaminococcaceae	Phascolarctobacterium
0.3103	0.852652	0.951678	Bacteria	Actinobacteriota	Coriobacteriia	Coriobacteriales	Eggerthellaceae	Gordonibacter
0.391864	0.756271	0.93098	Bacteria	Firmicutes	Clostridia	Oscillospirales	Oscillospiraceae	Colidextribacter
0.408675	0.703414	0.93098	Bacteria	Firmicutes	Clostridia	Lachnospirales	Lachnospiraceae	Syntrophococcus
0.448361	0.752852	0.93098	Bacteria	Bacteroidota	Bacteroidia	Bacteroidales	Rikenellaceae	Alistipes
0.484625	0.707571	0.93098	Bacteria	Bacteroidota	Bacteroidia	Bacteroidales	Bacteroidaceae	Bacteroides
0.525105	0.777795	0.93286	Bacteria	Firmicutes	Bacilli	Erysipelotrichales	Erysipelatoclostridiaceae	Erysipelatoclostridium
0.566992	0.722924	0.93098	Bacteria	Firmicutes	Clostridia	Oscillospirales	Oscillospiraceae	UCG-002
0.606059	0.680018	0.93098	Bacteria	Firmicutes	Clostridia	Peptococcales	Peptococcaceae	Peptococcus
0.670908	0.741835	0.93098	Bacteria	Desulfobacterota	Desulfovibrionia	Desulfovibrionales	Desulfovibrionaceae	Desulfovibrio
0.673869	0.5915	0.921877	Bacteria	Firmicutes	Clostridia	Oscillospirales	Ruminococcaceae	UBA1819
0.677694	0.586419	0.921877	Bacteria	Actinobacteriota	Coriobacteriia	Coriobacteriales	Atopobiaceae	Olsenella
0.726949	0.633484	0.92647	Bacteria	Firmicutes	Clostridia	Lachnospirales	Lachnospiraceae	Lachnoclostridium
0.730654	0.610903	0.921877	Bacteria	Firmicutes	Clostridia	Oscillospirales	Oscillospiraceae	UCG-005
0.775951	0.658474	0.92821	Bacteria	Actinobacteriota	Actinobacteria	Bifidobacteriales	Bifidobacteriaceae	Bifidobacterium
0.78798	0.656028	0.92821	Bacteria	Firmicutes	Clostridia	Oscillospirales	Oscillospiraceae	Flavonifractor
0.877237	0.613872	0.921877	Bacteria	Actinobacteriota	Coriobacteriia	Coriobacteriales	Eggerthellaceae	Eggerthella
0.93604	0.614585	0.921877	Bacteria	Firmicutes	Clostridia	Lachnospirales	Lachnospiraceae	[Ruminococcus] gnavus group
0.942419	0.459171	0.790333	Bacteria	Desulfobacterota	Desulfovibrionia	Desulfovibrionales	Desulfovibrionaceae	Bilophila
1.01657	0.458229	0.790333	Bacteria	Actinobacteriota	Coriobacteriia	Coriobacteriales	Eggerthellaceae	Slackia
1.21774	0.459339	0.790333	Bacteria	Actinobacteriota	Coriobacteriia	Coriobacteriales	Eggerthellaceae	Senegalimassilia
1.31516	0.405938	0.764782	Bacteria	Bacteroidota	Bacteroidia	Bacteroidales	Marinifilaceae	Odoribacter
1.3216	0.433181	0.790333	Bacteria	Bacteroidota	Bacteroidia	Bacteroidales	Marinifilaceae	Butyricimonas
1.45974	0.226114	0.603911	Bacteria	Firmicutes	Clostridia	Oscillospirales	Ruminococcaceae	Candidatus Soleaferrea
1.56547	0.361781	0.750009	Bacteria	Firmicutes	Clostridia	Lachnospirales	Lachnospiraceae	Lachnospira
1.64387	0.233277	0.606519	Bacteria	Firmicutes	Clostridia	Oscillospirales	Oscillospiraceae	Oscillibacter
1.65117	0.37821	0.750009	Bacteria	Proteobacteria	Gammaproteobacteria	Enterobacterales	Pasteurellaceae	Haemophilus
1.88777	0.217307	0.603911	Bacteria	Firmicutes	Clostridia	Lachnospirales	Lachnospiraceae	Lachnospiraceae NK4A136 group
1.98686	0.1909	0.5931	Bacteria	Firmicutes	Negativicutes	Veillonellales-Selenomonadales	Veillonellaceae	Veillonella
2.00413	0.227112	0.603911	Bacteria	Firmicutes	Clostridia	Lachnospirales	Lachnospiraceae	Howardella
2.10311	0.368621	0.750009	Bacteria	Bacteroidota	Bacteroidia	Bacteroidales	Rikenellaceae	Rikenellaceae RC9 gut group
2.20397	0.199612	0.5931	Bacteria	Bacteroidota	Bacteroidia	Bacteroidales	Prevotellaceae	Prevotella_7
2.28748	0.142912	0.557356	Bacteria	Firmicutes	Clostridia	Oscillospirales	Oscillospiraceae	Oscillospira
2.31761	0.325181	0.717853	Bacteria	Bacteroidota	Bacteroidia	Bacteroidales	Prevotellaceae	Prevotellaceae NK3B31 group
2.32912	0.142065	0.557356	Bacteria	Firmicutes	Clostridia	Oscillospirales	Oscillospiraceae	UCG-003
2.37182	0.249818	0.635406	Bacteria	Firmicutes	Bacilli	Lactobacillales	Lactobacillaceae	Ligilactobacillus
2.45577	0.212979	0.603911	Bacteria	Proteobacteria	Gammaproteobacteria	Enterobacterales	Enterobacteriaceae	Escherichia-Shigella
2.53097	0.296875	0.678163	Bacteria	Firmicutes	Bacilli	Erysipelotrichales	Erysipelotrichaceae	Holdemanella
2.56698	0.257658	0.641404	Bacteria	Bacteroidota	Bacteroidia	Bacteroidales	Prevotellaceae	Paraprevotella
2.71835	0.0617644	0.409213	Bacteria	Firmicutes	Clostridia	Lachnospirales	Lachnospiraceae	Tuzzerella
2.87664	0.202769	0.5931	Bacteria	Firmicutes	Bacilli	Erysipelotrichales	Erysipelatoclostridiaceae	Catenibacterium
2.9277	0.0554462	0.405451	Bacteria	Firmicutes	Clostridia	Lachnospirales	Lachnospiraceae	Anaerostignum
2.96616	0.140387	0.557356	Bacteria	Bacteroidota	Bacteroidia	Bacteroidales	Prevotellaceae	Alloprevotella
3.07438	0.109378	0.511887	Bacteria	Proteobacteria	Gammaproteobacteria	Enterobacterales	Enterobacteriaceae	Klebsiella
3.56911	0.201929	0.5931	Bacteria	Bacteroidota	Bacteroidia	Bacteroidales	Prevotellaceae	Prevotella_9
4.76798	0.0207162	0.220345	Bacteria	Proteobacteria	Gammaproteobacteria	Burkholderiales	Sutterellaceae	Sutterella
5.18478	0.0108612	0.141195	Bacteria	Bacteroidota	Bacteroidia	Bacteroidales	Prevotellaceae	Prevotella
7.60742	0.00200091	0.0780354	Bacteria	Firmicutes	Negativicutes	Veillonellales-Selenomonadales	Veillonellaceae	Dialister

## Sheet: Linda_results_Species_HvsP
log2FoldChange	pvalue	padj	Kingdom	Phylum	Class	Order	Family	Genus	Species
-8.89802	0.0785196	0.630986	Bacteria	Bacteroidota	Bacteroidia	Bacteroidales	Prevotellaceae	Prevotella_9	Prevotella_9_copri
-8.2356	0.0336246	0.455177	Bacteria	Actinobacteriota	Actinobacteria	Bifidobacteriales	Bifidobacteriaceae	Bifidobacterium	Bifidobacterium_bifidum
-6.83562	0.0135091	0.253296	Bacteria	Firmicutes	Clostridia	Lachnospirales	Lachnospiraceae	Lachnoclostridium	Lachnoclostridium_edouardi
-6.57198	0.0597817	0.560453	Bacteria	Actinobacteriota	Actinobacteria	Bifidobacteriales	Bifidobacteriaceae	Bifidobacterium	Bifidobacterium_longum
-5.57777	0.107385	0.649923	Bacteria	Actinobacteriota	Actinobacteria	Bifidobacteriales	Bifidobacteriaceae	Bifidobacterium	Bifidobacterium_adolescentis
-5.55724	0.0925446	0.630986	Bacteria	Firmicutes	Clostridia	Oscillospirales	Oscillospiraceae	Flavonifractor	Flavonifractor_plautii
-5.23322	0.17936	0.864748	Bacteria	Bacteroidota	Bacteroidia	Bacteroidales	Bacteroidaceae	Bacteroides	Bacteroides_dorei
-4.87113	0.0364141	0.455177	Bacteria	Actinobacteriota	Coriobacteriia	Coriobacteriales	Coriobacteriaceae	Collinsella	Collinsella_aerofaciens
-4.68027	0.156991	0.841024	Bacteria	Firmicutes	Clostridia	Peptostreptococcales-Tissierellales	Peptostreptococcaceae	Romboutsia	Romboutsia_timonensis
-4.48507	0.225155	0.879713	Bacteria	Bacteroidota	Bacteroidia	Bacteroidales	Barnesiellaceae	Barnesiella	Barnesiella_intestinihominis
-4.46913	0.260239	0.879713	Bacteria	Bacteroidota	Bacteroidia	Bacteroidales	Bacteroidaceae	Bacteroides	Bacteroides_caccae
-4.36511	0.112653	0.649923	Bacteria	Firmicutes	Clostridia	Oscillospirales	Butyricicoccaceae	Butyricicoccus	Butyricicoccus_faecihominis
-4.29318	0.231828	0.879713	Bacteria	Bacteroidota	Bacteroidia	Bacteroidales	Tannerellaceae	Parabacteroides	Parabacteroides_merdae
-4.24311	0.240971	0.879713	Bacteria	Firmicutes	Clostridia	Lachnospirales	Lachnospiraceae	Blautia	Blautia_wexlerae
-3.85785	0.266176	0.879713	Bacteria	Firmicutes	Clostridia	Lachnospirales	Lachnospiraceae	Lachnospira	Lachnospira_pectinoschiza
-3.80083	0.206642	0.879713	Bacteria	Firmicutes	Clostridia	Oscillospirales	Ruminococcaceae	Faecalibacterium	Faecalibacterium_prausnitzii
-3.4738	0.294086	0.919019	Bacteria	Firmicutes	Clostridia	Lachnospirales	Lachnospiraceae	Roseburia	Roseburia_intestinalis
-3.47338	0.355462	0.993945	Bacteria	Bacteroidota	Bacteroidia	Bacteroidales	Rikenellaceae	Alistipes	Alistipes_putredinis
-3.00817	0.18448	0.864748	Bacteria	Firmicutes	Clostridia	Lachnospirales	Lachnospiraceae	Blautia	Blautia_massiliensis
-2.86122	0.269779	0.879713	Bacteria	Bacteroidota	Bacteroidia	Bacteroidales	Rikenellaceae	Alistipes	Alistipes_indistinctus
-2.72232	0.454619	0.993945	Bacteria	Firmicutes	Clostridia	Peptostreptococcales-Tissierellales	Peptostreptococcaceae	Intestinibacter	Intestinibacter_bartlettii
-2.70552	0.381823	0.993945	Bacteria	Proteobacteria	Gammaproteobacteria	Burkholderiales	Sutterellaceae	Parasutterella	Parasutterella_excrementihominis
-2.40748	0.423256	0.993945	Bacteria	Bacteroidota	Bacteroidia	Bacteroidales	Bacteroidaceae	Bacteroides	Bacteroides_ovatus
-2.25144	0.391463	0.993945	Bacteria	Bacteroidota	Bacteroidia	Bacteroidales	Marinifilaceae	Odoribacter	Odoribacter_splanchnicus
-2.18405	0.590193	0.993945	Bacteria	Bacteroidota	Bacteroidia	Bacteroidales	Bacteroidaceae	Bacteroides	Bacteroides_vulgatus
-2.11327	0.454578	0.993945	Bacteria	Firmicutes	Clostridia	Lachnospirales	Lachnospiraceae	Blautia	Blautia_faecis
-1.58144	0.612799	0.993945	Bacteria	Firmicutes	Clostridia	Lachnospirales	Lachnospiraceae	Blautia	Blautia_obeum
-1.17317	0.729743	0.993945	Bacteria	Firmicutes	Clostridia	Lachnospirales	Lachnospiraceae	Lachnospiraceae NK4A136 group	Lachnospiraceae NK4A136 group_bacterium
-1.16634	0.649003	0.993945	Bacteria	Bacteroidota	Bacteroidia	Bacteroidales	Marinifilaceae	Butyricimonas	Butyricimonas_faecihominis
-1.04931	0.801366	0.993945	Bacteria	Firmicutes	Negativicutes	Veillonellales-Selenomonadales	Veillonellaceae	Dialister	Dialister_invisus
-1.01987	0.579696	0.993945	Bacteria	Proteobacteria	Gammaproteobacteria	Burkholderiales	Oxalobacteraceae	Oxalobacter	Oxalobacter_formigenes
-0.989851	0.726585	0.993945	Bacteria	Bacteroidota	Bacteroidia	Bacteroidales	Tannerellaceae	Parabacteroides	Parabacteroides_distasonis
-0.740299	0.82301	0.993945	Bacteria	Firmicutes	Negativicutes	Acidaminococcales	Acidaminococcaceae	Phascolarctobacterium	Phascolarctobacterium_faecium
-0.72532	0.769463	0.993945	Bacteria	Actinobacteriota	Coriobacteriia	Coriobacteriales	Eggerthellaceae	Slackia	Slackia_isoflavoniconvertens
-0.617601	0.794884	0.993945	Bacteria	Firmicutes	Clostridia	Lachnospirales	Lachnospiraceae	Howardella	Howardella_ureilytica
-0.530673	0.806309	0.993945	Bacteria	Desulfobacterota	Desulfovibrionia	Desulfovibrionales	Desulfovibrionaceae	Bilophila	Bilophila_wadsworthia
-0.413079	0.866684	0.993945	Bacteria	Firmicutes	Clostridia	Peptostreptococcales-Tissierellales	Peptostreptococcaceae	Terrisporobacter	Terrisporobacter_mayombei
-0.276428	0.920956	0.993945	Bacteria	Proteobacteria	Gammaproteobacteria	Enterobacterales	Pasteurellaceae	Haemophilus	Haemophilus_parainfluenzae
-0.275321	0.92648	0.993945	Bacteria	Bacteroidota	Bacteroidia	Bacteroidales	Bacteroidaceae	Bacteroides	Bacteroides_fragilis
-0.259683	0.906948	0.993945	Bacteria	Firmicutes	Clostridia	Lachnospirales	Lachnospiraceae	Lachnospiraceae FCS020 group	Lachnospiraceae FCS020 group_bacterium
-0.10692	0.974194	0.993945	Bacteria	Bacteroidota	Bacteroidia	Bacteroidales	Bacteroidaceae	Bacteroides	Bacteroides_cellulosilyticus
-0.0938303	0.975065	0.993945	Bacteria	Firmicutes	Clostridia	Lachnospirales	Lachnospiraceae	Roseburia	Roseburia_hominis
-0.0817149	0.983631	0.993945	Bacteria	Firmicutes	Bacilli	Erysipelotrichales	Erysipelotrichaceae	Holdemanella	Holdemanella_biformis
-0.0369332	0.988453	0.993945	Bacteria	Actinobacteriota	Coriobacteriia	Coriobacteriales	Eggerthellaceae	Adlercreutzia	Adlercreutzia_equolifaciens
-0.0179293	0.993945	0.993945	Bacteria	Bacteroidota	Bacteroidia	Bacteroidales	Marinifilaceae	Butyricimonas	Butyricimonas_virosa
0.053844	0.988082	0.993945	Bacteria	Firmicutes	Clostridia	Lachnospirales	Lachnospiraceae	Coprococcus	Coprococcus_eutactus
0.113891	0.955051	0.993945	Bacteria	Bacteroidota	Bacteroidia	Bacteroidales	Barnesiellaceae	Coprobacter	Coprobacter_fastidiosus
0.158487	0.955446	0.993945	Bacteria	Bacteroidota	Bacteroidia	Bacteroidales	Bacteroidaceae	Bacteroides	Bacteroides_uniformis
0.204642	0.928684	0.993945	Bacteria	Bacteroidota	Bacteroidia	Bacteroidales	Rikenellaceae	Alistipes	Alistipes_ihumii
0.292763	0.920545	0.993945	Bacteria	Bacteroidota	Bacteroidia	Bacteroidales	Rikenellaceae	Alistipes	Alistipes_inops
0.315123	0.911577	0.993945	Bacteria	Bacteroidota	Bacteroidia	Bacteroidales	Bacteroidaceae	Bacteroides	Bacteroides_salyersiae
0.504167	0.826287	0.993945	Bacteria	Firmicutes	Negativicutes	Veillonellales-Selenomonadales	Veillonellaceae	Allisonella	Allisonella_histaminiformans
0.674078	0.805202	0.993945	Bacteria	Verrucomicrobiota	Verrucomicrobiae	Verrucomicrobiales	Akkermansiaceae	Akkermansia	Akkermansia_muciniphila
0.780577	0.776652	0.993945	Bacteria	Actinobacteriota	Coriobacteriia	Coriobacteriales	Eggerthellaceae	Senegalimassilia	Senegalimassilia_anaerobia
0.878081	0.766819	0.993945	Bacteria	Firmicutes	Clostridia	Oscillospirales	Ruminococcaceae	Ruminococcus	Ruminococcus_callidus
1.23026	0.707386	0.993945	Bacteria	Firmicutes	Clostridia	Lachnospirales	Lachnospiraceae	Butyrivibrio	Butyrivibrio_crossotus
1.39109	0.723864	0.993945	Bacteria	Firmicutes	Clostridia	Oscillospirales	Ruminococcaceae	Ruminococcus	Ruminococcus_bicirculans
1.52292	0.722624	0.993945	Bacteria	Bacteroidota	Bacteroidia	Bacteroidales	Bacteroidaceae	Bacteroides	Bacteroides_coprocola
1.62845	0.590672	0.993945	Bacteria	Bacteroidota	Bacteroidia	Bacteroidales	Rikenellaceae	Alistipes	Alistipes_obesi
1.65112	0.64254	0.993945	Bacteria	Firmicutes	Bacilli	Erysipelotrichales	Erysipelotrichaceae	Turicibacter	Turicibacter_sanguinis
1.70996	0.657438	0.993945	Bacteria	Firmicutes	Clostridia	Oscillospirales	Ruminococcaceae	Subdoligranulum	Subdoligranulum_variabile
1.74747	0.639064	0.993945	Bacteria	Bacteroidota	Bacteroidia	Bacteroidales	Rikenellaceae	Alistipes	Alistipes_finegoldii
1.80185	0.55759	0.993945	Bacteria	Firmicutes	Clostridia	Lachnospirales	Lachnospiraceae	Roseburia	Roseburia_inulinivorans
2.25008	0.399563	0.993945	Bacteria	Firmicutes	Clostridia	Lachnospirales	Lachnospiraceae	Coprococcus	Coprococcus_catus
2.32908	0.52098	0.993945	Bacteria	Bacteroidota	Bacteroidia	Bacteroidales	Bacteroidaceae	Bacteroides	Bacteroides_thetaiotaomicron
2.55609	0.473341	0.993945	Bacteria	Bacteroidota	Bacteroidia	Bacteroidales	Bacteroidaceae	Bacteroides	Bacteroides_eggerthii
2.59724	0.537608	0.993945	Bacteria	Bacteroidota	Bacteroidia	Bacteroidales	Bacteroidaceae	Bacteroides	Bacteroides_plebeius
2.67644	0.439517	0.993945	Bacteria	Bacteroidota	Bacteroidia	Bacteroidales	Rikenellaceae	Alistipes	Alistipes_shahii
2.71607	0.529372	0.993945	Bacteria	Bacteroidota	Bacteroidia	Bacteroidales	Bacteroidaceae	Bacteroides	Bacteroides_massiliensis
3.06001	0.323995	0.971985	Bacteria	Firmicutes	Bacilli	Erysipelotrichales	Erysipelatoclostridiaceae	Erysipelotrichaceae UCG-003	Erysipelotrichaceae UCG-003_bacterium
5.42124	0.0858233	0.630986	Bacteria	Firmicutes	Clostridia	Lachnospirales	Lachnospiraceae	Dorea	Dorea_formicigenerans
6.23639	0.0443898	0.475605	Bacteria	Firmicutes	Clostridia	Lachnospirales	Lachnospiraceae	Coprococcus	Coprococcus_comes
6.27811	0.00956577	0.239144	Bacteria	Firmicutes	Clostridia	Lachnospirales	Lachnospiraceae	Fusicatenibacter	Fusicatenibacter_saccharivorans
8.0654	0.00139641	0.0523652	Bacteria	Firmicutes	Clostridia	Lachnospirales	Lachnospiraceae	Anaerostipes	Anaerostipes_hadrus
8.1571	2.14195e-05	0.00160646	Bacteria	Firmicutes	Clostridia	Lachnospirales	Lachnospiraceae	Dorea	Dorea_longicatena

## Sheet: Linda_results_Species_HvsDT2
log2FoldChange	pvalue	padj	Kingdom	Phylum	Class	Order	Family	Genus	Species
-9.04643	0.0154968	0.333578	Bacteria	Actinobacteriota	Actinobacteria	Bifidobacteriales	Bifidobacteriaceae	Bifidobacterium	Bifidobacterium_longum
-8.33922	0.0389498	0.486873	Bacteria	Bacteroidota	Bacteroidia	Bacteroidales	Rikenellaceae	Alistipes	Alistipes_putredinis
-7.43214	0.0697936	0.52128	Bacteria	Actinobacteriota	Actinobacteria	Bifidobacteriales	Bifidobacteriaceae	Bifidobacterium	Bifidobacterium_bifidum
-7.37262	0.0460958	0.493883	Bacteria	Actinobacteriota	Actinobacteria	Bifidobacteriales	Bifidobacteriaceae	Bifidobacterium	Bifidobacterium_adolescentis
-7.20974	0.0182191	0.333578	Bacteria	Firmicutes	Clostridia	Lachnospirales	Lachnospiraceae	Blautia	Blautia_faecis
-6.74345	0.0222385	0.333578	Bacteria	Firmicutes	Clostridia	Oscillospirales	Butyricicoccaceae	Butyricicoccus	Butyricicoccus_faecihominis
-6.65566	0.108737	0.536819	Bacteria	Bacteroidota	Bacteroidia	Bacteroidales	Bacteroidaceae	Bacteroides	Bacteroides_dorei
-6.34369	0.0720543	0.52128	Bacteria	Firmicutes	Clostridia	Peptostreptococcales-Tissierellales	Peptostreptococcaceae	Romboutsia	Romboutsia_timonensis
-6.21872	0.114521	0.536819	Bacteria	Bacteroidota	Bacteroidia	Bacteroidales	Barnesiellaceae	Barnesiella	Barnesiella_intestinihominis
-6.15458	0.248907	0.746721	Bacteria	Bacteroidota	Bacteroidia	Bacteroidales	Prevotellaceae	Prevotella_9	Prevotella_9_copri
-6.05685	0.0148229	0.333578	Bacteria	Actinobacteriota	Coriobacteriia	Coriobacteriales	Coriobacteriaceae	Collinsella	Collinsella_aerofaciens
-5.68287	0.14026	0.595943	Bacteria	Firmicutes	Clostridia	Lachnospirales	Lachnospiraceae	Blautia	Blautia_wexlerae
-5.60032	0.112934	0.536819	Bacteria	Firmicutes	Clostridia	Lachnospirales	Lachnospiraceae	Roseburia	Roseburia_intestinalis
-5.46001	0.0889907	0.536819	Bacteria	Firmicutes	Clostridia	Oscillospirales	Ruminococcaceae	Faecalibacterium	Faecalibacterium_prausnitzii
-5.15282	0.0764544	0.52128	Bacteria	Firmicutes	Clostridia	Lachnospirales	Lachnospiraceae	Lachnoclostridium	Lachnoclostridium_edouardi
-4.70006	0.143026	0.595943	Bacteria	Bacteroidota	Bacteroidia	Bacteroidales	Bacteroidaceae	Bacteroides	Bacteroides_ovatus
-4.50787	0.237038	0.740745	Bacteria	Bacteroidota	Bacteroidia	Bacteroidales	Tannerellaceae	Parabacteroides	Parabacteroides_merdae
-4.39645	0.233052	0.740745	Bacteria	Firmicutes	Clostridia	Lachnospirales	Lachnospiraceae	Lachnospira	Lachnospira_pectinoschiza
-4.29844	0.19215	0.734976	Bacteria	Proteobacteria	Gammaproteobacteria	Burkholderiales	Sutterellaceae	Parasutterella	Parasutterella_excrementihominis
-4.14198	0.235425	0.740745	Bacteria	Firmicutes	Clostridia	Oscillospirales	Oscillospiraceae	Flavonifractor	Flavonifractor_plautii
-3.92024	0.104432	0.536819	Bacteria	Firmicutes	Clostridia	Lachnospirales	Lachnospiraceae	Blautia	Blautia_massiliensis
-3.7098	0.337863	0.974605	Bacteria	Firmicutes	Clostridia	Peptostreptococcales-Tissierellales	Peptostreptococcaceae	Intestinibacter	Intestinibacter_bartlettii
-3.38073	0.421549	0.995115	Bacteria	Bacteroidota	Bacteroidia	Bacteroidales	Bacteroidaceae	Bacteroides	Bacteroides_caccae
-2.94582	0.375539	0.995115	Bacteria	Firmicutes	Clostridia	Lachnospirales	Lachnospiraceae	Blautia	Blautia_obeum
-2.28556	0.405592	0.995115	Bacteria	Bacteroidota	Bacteroidia	Bacteroidales	Rikenellaceae	Alistipes	Alistipes_indistinctus
-1.80049	0.550635	0.995115	Bacteria	Bacteroidota	Bacteroidia	Bacteroidales	Bacteroidaceae	Bacteroides	Bacteroides_salyersiae
-1.68396	0.389854	0.995115	Bacteria	Proteobacteria	Gammaproteobacteria	Burkholderiales	Oxalobacteraceae	Oxalobacter	Oxalobacter_formigenes
-1.6456	0.639426	0.995115	Bacteria	Bacteroidota	Bacteroidia	Bacteroidales	Bacteroidaceae	Bacteroides	Bacteroides_cellulosilyticus
-1.6392	0.487857	0.995115	Bacteria	Firmicutes	Clostridia	Lachnospirales	Lachnospiraceae	Lachnospiraceae FCS020 group	Lachnospiraceae FCS020 group_bacterium
-1.59624	0.595606	0.995115	Bacteria	Bacteroidota	Bacteroidia	Bacteroidales	Tannerellaceae	Parabacteroides	Parabacteroides_distasonis
-1.46005	0.590403	0.995115	Bacteria	Actinobacteriota	Coriobacteriia	Coriobacteriales	Eggerthellaceae	Adlercreutzia	Adlercreutzia_equolifaciens
-1.10556	0.75914	0.995115	Bacteria	Firmicutes	Clostridia	Lachnospirales	Lachnospiraceae	Lachnospiraceae NK4A136 group	Lachnospiraceae NK4A136 group_bacterium
-1.07441	0.730394	0.995115	Bacteria	Bacteroidota	Bacteroidia	Bacteroidales	Rikenellaceae	Alistipes	Alistipes_inops
-1.01334	0.750657	0.995115	Bacteria	Firmicutes	Clostridia	Lachnospirales	Lachnospiraceae	Roseburia	Roseburia_hominis
-0.981914	0.754837	0.995115	Bacteria	Firmicutes	Clostridia	Oscillospirales	Ruminococcaceae	Ruminococcus	Ruminococcus_callidus
-0.912137	0.841273	0.995115	Bacteria	Bacteroidota	Bacteroidia	Bacteroidales	Bacteroidaceae	Bacteroides	Bacteroides_coprocola
-0.840492	0.74777	0.995115	Bacteria	Firmicutes	Clostridia	Peptostreptococcales-Tissierellales	Peptostreptococcaceae	Terrisporobacter	Terrisporobacter_mayombei
-0.79583	0.710833	0.995115	Bacteria	Bacteroidota	Bacteroidia	Bacteroidales	Barnesiellaceae	Coprobacter	Coprobacter_fastidiosus
-0.765053	0.7617	0.995115	Bacteria	Firmicutes	Clostridia	Lachnospirales	Lachnospiraceae	Howardella	Howardella_ureilytica
-0.622872	0.822916	0.995115	Bacteria	Bacteroidota	Bacteroidia	Bacteroidales	Marinifilaceae	Odoribacter	Odoribacter_splanchnicus
-0.601197	0.888867	0.995115	Bacteria	Bacteroidota	Bacteroidia	Bacteroidales	Bacteroidaceae	Bacteroides	Bacteroides_vulgatus
-0.312573	0.917359	0.995115	Bacteria	Bacteroidota	Bacteroidia	Bacteroidales	Bacteroidaceae	Bacteroides	Bacteroides_uniformis
-0.141156	0.973057	0.995115	Bacteria	Firmicutes	Clostridia	Oscillospirales	Ruminococcaceae	Ruminococcus	Ruminococcus_bicirculans
-0.12614	0.958754	0.995115	Bacteria	Firmicutes	Negativicutes	Veillonellales-Selenomonadales	Veillonellaceae	Allisonella	Allisonella_histaminiformans
-0.0193981	0.995115	0.995115	Bacteria	Bacteroidota	Bacteroidia	Bacteroidales	Bacteroidaceae	Bacteroides	Bacteroides_fragilis
-0.0183002	0.993646	0.995115	Bacteria	Desulfobacterota	Desulfovibrionia	Desulfovibrionales	Desulfovibrionaceae	Bilophila	Bilophila_wadsworthia
0.0938631	0.980161	0.995115	Bacteria	Firmicutes	Bacilli	Erysipelotrichales	Erysipelotrichaceae	Turicibacter	Turicibacter_sanguinis
0.176863	0.95172	0.995115	Bacteria	Actinobacteriota	Coriobacteriia	Coriobacteriales	Eggerthellaceae	Senegalimassilia	Senegalimassilia_anaerobia
0.243786	0.92607	0.995115	Bacteria	Actinobacteriota	Coriobacteriia	Coriobacteriales	Eggerthellaceae	Slackia	Slackia_isoflavoniconvertens
0.258632	0.940734	0.995115	Bacteria	Firmicutes	Clostridia	Lachnospirales	Lachnospiraceae	Butyrivibrio	Butyrivibrio_crossotus
0.302056	0.9315	0.995115	Bacteria	Firmicutes	Negativicutes	Acidaminococcales	Acidaminococcaceae	Phascolarctobacterium	Phascolarctobacterium_faecium
0.30306	0.945925	0.995115	Bacteria	Bacteroidota	Bacteroidia	Bacteroidales	Bacteroidaceae	Bacteroides	Bacteroides_plebeius
0.308734	0.898819	0.995115	Bacteria	Bacteroidota	Bacteroidia	Bacteroidales	Rikenellaceae	Alistipes	Alistipes_ihumii
0.405811	0.888787	0.995115	Bacteria	Verrucomicrobiota	Verrucomicrobiae	Verrucomicrobiales	Akkermansiaceae	Akkermansia	Akkermansia_muciniphila
0.429017	0.909608	0.995115	Bacteria	Bacteroidota	Bacteroidia	Bacteroidales	Bacteroidaceae	Bacteroides	Bacteroides_eggerthii
0.600696	0.810807	0.995115	Bacteria	Bacteroidota	Bacteroidia	Bacteroidales	Marinifilaceae	Butyricimonas	Butyricimonas_virosa
0.896377	0.761939	0.995115	Bacteria	Proteobacteria	Gammaproteobacteria	Enterobacterales	Pasteurellaceae	Haemophilus	Haemophilus_parainfluenzae
0.990514	0.762983	0.995115	Bacteria	Firmicutes	Bacilli	Erysipelotrichales	Erysipelatoclostridiaceae	Erysipelotrichaceae UCG-003	Erysipelotrichaceae UCG-003_bacterium
1.00802	0.710985	0.995115	Bacteria	Bacteroidota	Bacteroidia	Bacteroidales	Marinifilaceae	Butyricimonas	Butyricimonas_faecihominis
1.14778	0.771634	0.995115	Bacteria	Bacteroidota	Bacteroidia	Bacteroidales	Rikenellaceae	Alistipes	Alistipes_finegoldii
1.1966	0.754652	0.995115	Bacteria	Firmicutes	Clostridia	Lachnospirales	Lachnospiraceae	Coprococcus	Coprococcus_eutactus
1.23053	0.701767	0.995115	Bacteria	Bacteroidota	Bacteroidia	Bacteroidales	Rikenellaceae	Alistipes	Alistipes_obesi
1.31689	0.686311	0.995115	Bacteria	Firmicutes	Clostridia	Lachnospirales	Lachnospiraceae	Roseburia	Roseburia_inulinivorans
1.44076	0.753129	0.995115	Bacteria	Bacteroidota	Bacteroidia	Bacteroidales	Bacteroidaceae	Bacteroides	Bacteroides_massiliensis
1.75824	0.667619	0.995115	Bacteria	Firmicutes	Clostridia	Oscillospirales	Ruminococcaceae	Subdoligranulum	Subdoligranulum_variabile
1.8956	0.503538	0.995115	Bacteria	Firmicutes	Clostridia	Lachnospirales	Lachnospiraceae	Coprococcus	Coprococcus_catus
2.0077	0.650484	0.995115	Bacteria	Firmicutes	Negativicutes	Veillonellales-Selenomonadales	Veillonellaceae	Dialister	Dialister_invisus
2.13907	0.578676	0.995115	Bacteria	Bacteroidota	Bacteroidia	Bacteroidales	Bacteroidaceae	Bacteroides	Bacteroides_thetaiotaomicron
2.32464	0.526927	0.995115	Bacteria	Bacteroidota	Bacteroidia	Bacteroidales	Rikenellaceae	Alistipes	Alistipes_shahii
2.56896	0.544087	0.995115	Bacteria	Firmicutes	Bacilli	Erysipelotrichales	Erysipelotrichaceae	Holdemanella	Holdemanella_biformis
2.85793	0.390131	0.995115	Bacteria	Firmicutes	Clostridia	Lachnospirales	Lachnospiraceae	Dorea	Dorea_formicigenerans
3.21945	0.202782	0.734976	Bacteria	Firmicutes	Clostridia	Lachnospirales	Lachnospiraceae	Fusicatenibacter	Fusicatenibacter_saccharivorans
4.13257	0.205793	0.734976	Bacteria	Firmicutes	Clostridia	Lachnospirales	Lachnospiraceae	Coprococcus	Coprococcus_comes
4.95901	0.0582817	0.52128	Bacteria	Firmicutes	Clostridia	Lachnospirales	Lachnospiraceae	Anaerostipes	Anaerostipes_hadrus
4.97162	0.0110423	0.333578	Bacteria	Firmicutes	Clostridia	Lachnospirales	Lachnospiraceae	Dorea	Dorea_longicatena

## Sheet: Linda_results_Species_PvsDT2
log2FoldChange	pvalue	padj	Kingdom	Phylum	Class	Order	Family	Genus	Species
-3.87871	0.00711616	0.352587	Bacteria	Firmicutes	Clostridia	Lachnospirales	Lachnospiraceae	Blautia	Blautia_faecis
-3.64807	0.0537844	0.508995	Bacteria	Bacteroidota	Bacteroidia	Bacteroidales	Rikenellaceae	Alistipes	Alistipes_putredinis
-1.96772	0.0309933	0.508995	Bacteria	Firmicutes	Clostridia	Lachnospirales	Lachnospiraceae	Dorea	Dorea_longicatena
-1.88862	0.122748	0.575383	Bacteria	Firmicutes	Clostridia	Lachnospirales	Lachnospiraceae	Anaerostipes	Anaerostipes_hadrus
-1.8409	0.121634	0.575383	Bacteria	Firmicutes	Clostridia	Lachnospirales	Lachnospiraceae	Fusicatenibacter	Fusicatenibacter_saccharivorans
-1.34555	0.388541	0.950255	Bacteria	Firmicutes	Clostridia	Lachnospirales	Lachnospiraceae	Dorea	Dorea_formicigenerans
-1.25668	0.465409	0.950255	Bacteria	Actinobacteriota	Actinobacteria	Bifidobacteriales	Bifidobacteriaceae	Bifidobacterium	Bifidobacterium_longum
-1.21729	0.569338	0.950255	Bacteria	Bacteroidota	Bacteroidia	Bacteroidales	Bacteroidaceae	Bacteroides	Bacteroides_coprocola
-1.16058	0.39435	0.950255	Bacteria	Firmicutes	Clostridia	Oscillospirales	Butyricicoccaceae	Butyricicoccus	Butyricicoccus_faecihominis
-1.07641	0.607993	0.950255	Bacteria	Bacteroidota	Bacteroidia	Bacteroidales	Bacteroidaceae	Bacteroides	Bacteroides_plebeius
-1.07481	0.472871	0.950255	Bacteria	Bacteroidota	Bacteroidia	Bacteroidales	Bacteroidaceae	Bacteroides	Bacteroides_ovatus
-0.909307	0.608377	0.950255	Bacteria	Bacteroidota	Bacteroidia	Bacteroidales	Bacteroidaceae	Bacteroides	Bacteroides_eggerthii
-0.908745	0.580698	0.950255	Bacteria	Firmicutes	Clostridia	Lachnospirales	Lachnospiraceae	Roseburia	Roseburia_intestinalis
-0.897848	0.525981	0.950255	Bacteria	Bacteroidota	Bacteroidia	Bacteroidales	Bacteroidaceae	Bacteroides	Bacteroides_salyersiae
-0.886053	0.561476	0.950255	Bacteria	Firmicutes	Clostridia	Lachnospirales	Lachnospiraceae	Coprococcus	Coprococcus_comes
-0.851729	0.580792	0.950255	Bacteria	Firmicutes	Bacilli	Erysipelotrichales	Erysipelatoclostridiaceae	Erysipelotrichaceae UCG-003	Erysipelotrichaceae UCG-003_bacterium
-0.642227	0.663466	0.950255	Bacteria	Firmicutes	Clostridia	Oscillospirales	Ruminococcaceae	Ruminococcus	Ruminococcus_callidus
-0.577083	0.735972	0.950255	Bacteria	Actinobacteriota	Actinobacteria	Bifidobacteriales	Bifidobacteriaceae	Bifidobacterium	Bifidobacterium_adolescentis
-0.515884	0.778443	0.950255	Bacteria	Bacteroidota	Bacteroidia	Bacteroidales	Barnesiellaceae	Barnesiella	Barnesiella_intestinihominis
-0.445653	0.785417	0.950255	Bacteria	Firmicutes	Clostridia	Peptostreptococcales-Tissierellales	Peptostreptococcaceae	Romboutsia	Romboutsia_timonensis
-0.441412	0.767321	0.950255	Bacteria	Firmicutes	Clostridia	Oscillospirales	Ruminococcaceae	Faecalibacterium	Faecalibacterium_prausnitzii
-0.375151	0.807257	0.950255	Bacteria	Proteobacteria	Gammaproteobacteria	Burkholderiales	Sutterellaceae	Parasutterella	Parasutterella_excrementihominis
-0.339493	0.848014	0.950255	Bacteria	Firmicutes	Bacilli	Erysipelotrichales	Erysipelotrichaceae	Turicibacter	Turicibacter_sanguinis
-0.320914	0.845524	0.950255	Bacteria	Bacteroidota	Bacteroidia	Bacteroidales	Bacteroidaceae	Bacteroides	Bacteroides_cellulosilyticus
-0.314477	0.872607	0.950255	Bacteria	Firmicutes	Clostridia	Oscillospirales	Ruminococcaceae	Ruminococcus	Ruminococcus_bicirculans
-0.221985	0.901557	0.950255	Bacteria	Firmicutes	Clostridia	Lachnospirales	Lachnospiraceae	Blautia	Blautia_wexlerae
-0.205353	0.871713	0.950255	Bacteria	Actinobacteriota	Coriobacteriia	Coriobacteriales	Eggerthellaceae	Adlercreutzia	Adlercreutzia_equolifaciens
-0.204675	0.915543	0.950255	Bacteria	Bacteroidota	Bacteroidia	Bacteroidales	Bacteroidaceae	Bacteroides	Bacteroides_dorei
-0.161753	0.883827	0.950255	Bacteria	Firmicutes	Clostridia	Lachnospirales	Lachnospiraceae	Lachnospiraceae FCS020 group	Lachnospiraceae FCS020 group_bacterium
-0.149411	0.918625	0.950255	Bacteria	Bacteroidota	Bacteroidia	Bacteroidales	Rikenellaceae	Alistipes	Alistipes_inops
-0.146616	0.924914	0.950255	Bacteria	Firmicutes	Clostridia	Lachnospirales	Lachnospiraceae	Blautia	Blautia_obeum
-0.0575474	0.978634	0.978634	Bacteria	Bacteroidota	Bacteroidia	Bacteroidales	Bacteroidaceae	Bacteroides	Bacteroides_massiliensis
0.032045	0.977626	0.978634	Bacteria	Actinobacteriota	Coriobacteriia	Coriobacteriales	Coriobacteriaceae	Collinsella	Collinsella_aerofaciens
0.230287	0.898795	0.950255	Bacteria	Firmicutes	Clostridia	Peptostreptococcales-Tissierellales	Peptostreptococcaceae	Intestinibacter	Intestinibacter_bartlettii
0.246134	0.880148	0.950255	Bacteria	Firmicutes	Clostridia	Lachnospirales	Lachnospiraceae	Butyrivibrio	Butyrivibrio_crossotus
0.298256	0.841974	0.950255	Bacteria	Firmicutes	Clostridia	Lachnospirales	Lachnospiraceae	Roseburia	Roseburia_hominis
0.305704	0.785431	0.950255	Bacteria	Firmicutes	Clostridia	Lachnospirales	Lachnospiraceae	Blautia	Blautia_massiliensis
0.308046	0.7597	0.950255	Bacteria	Bacteroidota	Bacteroidia	Bacteroidales	Barnesiellaceae	Coprobacter	Coprobacter_fastidiosus
0.553674	0.546304	0.950255	Bacteria	Proteobacteria	Gammaproteobacteria	Burkholderiales	Oxalobacteraceae	Oxalobacter	Oxalobacter_formigenes
0.58746	0.608058	0.950255	Bacteria	Firmicutes	Negativicutes	Veillonellales-Selenomonadales	Veillonellaceae	Allisonella	Allisonella_histaminiformans
0.611378	0.664758	0.950255	Bacteria	Bacteroidota	Bacteroidia	Bacteroidales	Tannerellaceae	Parabacteroides	Parabacteroides_distasonis
0.614053	0.65437	0.950255	Bacteria	Actinobacteriota	Coriobacteriia	Coriobacteriales	Eggerthellaceae	Senegalimassilia	Senegalimassilia_anaerobia
0.618077	0.739093	0.950255	Bacteria	Bacteroidota	Bacteroidia	Bacteroidales	Rikenellaceae	Alistipes	Alistipes_finegoldii
0.679174	0.693335	0.950255	Bacteria	Firmicutes	Clostridia	Lachnospirales	Lachnospiraceae	Lachnospira	Lachnospira_pectinoschiza
0.732812	0.632047	0.950255	Bacteria	Firmicutes	Clostridia	Lachnospirales	Lachnospiraceae	Roseburia	Roseburia_inulinivorans
0.746707	0.597654	0.950255	Bacteria	Bacteroidota	Bacteroidia	Bacteroidales	Bacteroidaceae	Bacteroides	Bacteroides_uniformis
0.790353	0.519727	0.950255	Bacteria	Firmicutes	Clostridia	Peptostreptococcales-Tissierellales	Peptostreptococcaceae	Terrisporobacter	Terrisporobacter_mayombei
0.81985	0.586818	0.950255	Bacteria	Bacteroidota	Bacteroidia	Bacteroidales	Rikenellaceae	Alistipes	Alistipes_obesi
0.863283	0.516145	0.950255	Bacteria	Firmicutes	Clostridia	Lachnospirales	Lachnospiraceae	Coprococcus	Coprococcus_catus
0.865961	0.61528	0.950255	Bacteria	Bacteroidota	Bacteroidia	Bacteroidales	Rikenellaceae	Alistipes	Alistipes_shahii
0.9495	0.486319	0.950255	Bacteria	Verrucomicrobiota	Verrucomicrobiae	Verrucomicrobiales	Akkermansiaceae	Akkermansia	Akkermansia_muciniphila
1.00307	0.573558	0.950255	Bacteria	Bacteroidota	Bacteroidia	Bacteroidales	Tannerellaceae	Parabacteroides	Parabacteroides_merdae
1.02776	0.569631	0.950255	Bacteria	Bacteroidota	Bacteroidia	Bacteroidales	Bacteroidaceae	Bacteroides	Bacteroides_thetaiotaomicron
1.07031	0.367113	0.950255	Bacteria	Firmicutes	Clostridia	Lachnospirales	Lachnospiraceae	Howardella	Howardella_ureilytica
1.26604	0.510277	0.950255	Bacteria	Firmicutes	Clostridia	Oscillospirales	Ruminococcaceae	Subdoligranulum	Subdoligranulum_variabile
1.28538	0.448174	0.950255	Bacteria	Firmicutes	Clostridia	Lachnospirales	Lachnospiraceae	Lachnospiraceae NK4A136 group	Lachnospiraceae NK4A136 group_bacterium
1.32186	0.248105	0.845811	Bacteria	Bacteroidota	Bacteroidia	Bacteroidales	Rikenellaceae	Alistipes	Alistipes_ihumii
1.47369	0.323172	0.950255	Bacteria	Bacteroidota	Bacteroidia	Bacteroidales	Bacteroidaceae	Bacteroides	Bacteroides_fragilis
1.73014	0.111675	0.575383	Bacteria	Desulfobacterota	Desulfovibrionia	Desulfovibrionales	Desulfovibrionaceae	Bilophila	Bilophila_wadsworthia
1.79343	0.16608	0.683679	Bacteria	Bacteroidota	Bacteroidia	Bacteroidales	Rikenellaceae	Alistipes	Alistipes_indistinctus
1.83639	0.121839	0.575383	Bacteria	Bacteroidota	Bacteroidia	Bacteroidales	Marinifilaceae	Butyricimonas	Butyricimonas_virosa
2.02123	0.28967	0.944576	Bacteria	Actinobacteriota	Actinobacteria	Bifidobacteriales	Bifidobacteriaceae	Bifidobacterium	Bifidobacterium_bifidum
2.18687	0.07923	0.575383	Bacteria	Actinobacteriota	Coriobacteriia	Coriobacteriales	Eggerthellaceae	Slackia	Slackia_isoflavoniconvertens
2.26012	0.173199	0.683679	Bacteria	Firmicutes	Negativicutes	Acidaminococcales	Acidaminococcaceae	Phascolarctobacterium	Phascolarctobacterium_faecium
2.30617	0.243785	0.845811	Bacteria	Bacteroidota	Bacteroidia	Bacteroidales	Bacteroidaceae	Bacteroides	Bacteroides_caccae
2.36052	0.191362	0.717606	Bacteria	Firmicutes	Clostridia	Lachnospirales	Lachnospiraceae	Coprococcus	Coprococcus_eutactus
2.39057	0.0881753	0.575383	Bacteria	Proteobacteria	Gammaproteobacteria	Enterobacterales	Pasteurellaceae	Haemophilus	Haemophilus_parainfluenzae
2.63302	0.109375	0.575383	Bacteria	Firmicutes	Clostridia	Oscillospirales	Oscillospiraceae	Flavonifractor	Flavonifractor_plautii
2.80062	0.168107	0.683679	Bacteria	Bacteroidota	Bacteroidia	Bacteroidales	Bacteroidaceae	Bacteroides	Bacteroides_vulgatus
2.84633	0.0319211	0.508995	Bacteria	Bacteroidota	Bacteroidia	Bacteroidales	Marinifilaceae	Odoribacter	Odoribacter_splanchnicus
2.90057	0.0343875	0.508995	Bacteria	Firmicutes	Clostridia	Lachnospirales	Lachnospiraceae	Lachnoclostridium	Lachnoclostridium_edouardi
3.39212	0.00940232	0.352587	Bacteria	Bacteroidota	Bacteroidia	Bacteroidales	Marinifilaceae	Butyricimonas	Butyricimonas_faecihominis
3.86844	0.0542928	0.508995	Bacteria	Firmicutes	Bacilli	Erysipelotrichales	Erysipelotrichaceae	Holdemanella	Holdemanella_biformis
3.96122	0.1152	0.575383	Bacteria	Bacteroidota	Bacteroidia	Bacteroidales	Prevotellaceae	Prevotella_9	Prevotella_9_copri
4.27477	0.0425268	0.508995	Bacteria	Firmicutes	Negativicutes	Veillonellales-Selenomonadales	Veillonellaceae	Dialister	Dialister_invisus
